# Two different cell-cycle processes determine the timing of cell division in *Escherichia coli*

Alexandra Colin<sup>1†‡</sup>, Gabriele Micali<sup>2,3†</sup>, Louis Faure<sup>1§</sup>, Marco Cosentino Lagomarsino<sup>4,5\*</sup>, Sven van Teeffelen<sup>6\*</sup>

**\*For correspondence:**

[sven.vanteeffelen@gmail.com](mailto:sven.vanteeffelen@gmail.com)  
(SVT); [marco.cosentino-lagomarsino@ifom.eu](mailto:marco.cosentino-lagomarsino@ifom.eu)  
(MCL)

†These authors contributed equally to this work

**Present address:** <sup>‡</sup>CEA, INRA, CNRS, UMR5168 – LPCV, Interdisciplinary Research Institute of Grenoble, Université Grenoble-Alpes, Grenoble, France; <sup>§</sup>Department of Molecular Neurosciences, Center for Brain Research, Medical University Vienna, 1090 Vienna, Austria

<sup>1</sup> Microbial Morphogenesis and Growth Laboratory, Institut Pasteur, Paris, France; <sup>2</sup> Department of Environmental Microbiology, Eawag, Dübendorf, Switzerland; <sup>3</sup> Department of Environmental Systems Science, ETH Zürich, Zürich Switzerland; <sup>4</sup> IFOM, FIRC Institute of Molecular Oncology, Via Adamello 16, 20139, Milan, Italy; <sup>5</sup> Physics Department, University of Milan, and I.N.F.N., Via Celoria 16, 20133, Milan, Italy; <sup>6</sup> Département de Microbiologie, Infectiologie et Immunologie, Université de Montréal, Pavillon Roger-Gaudry, C.P. 6128, Succursale Centreville, Montréal, Canada

**Abstract** Cells must control the cell cycle to ensure that key processes are brought to completion. In *Escherichia coli*, it is controversial whether cell division is tied to chromosome replication or to a replication-independent inter-division process. A recent model suggests instead that *both* processes may limit cell division with comparable odds in single cells. Here, we tested this possibility experimentally by monitoring single-cell division and replication over multiple generations at slow growth. We then perturbed cell width, causing an increase of the time between replication termination and division. As a consequence, replication became decreasingly limiting for cell division, while correlations between birth and division and between subsequent replication-initiation events were maintained. Our experiments support the hypothesis that both chromosome replication and a replication-independent inter-division process can limit cell division: the two processes have balanced contributions in non-perturbed cells, while our width perturbations increase the odds of the replication-independent process being limiting.

## Introduction

Temporal regulation of cell division is essential for cellular proliferation in all organisms. Timing of cell division determines average cell size in a population of growing cells and guarantees that every daughter cell receives one complete copy of chromosomal DNA. Despite its importance the process remains not understood even in the best-studied model system *Escherichia coli*.

Three conceptually different classes of models have been proposed to explain division control in *E. coli* (Figure 1B).

According to the first class of models, DNA replication and segregation are regarded as limiting for cell division, while division has no influence on replication. At the single-cell level, different couplings between DNA replication and cell division have been suggested: a "constant" (size-uncoupled) duration since the time of DNA replication initiation (C+D period in Figure 1A) (*Ho and Amir, 2015; Wallden et al., 2016*), or the addition of a "constant" (size-uncoupled) size between replication initiation and division (*Witz et al., 2019*).

A second class of models suggests that DNA replication has no direct influence on the timing

41 of cell division under unperturbed growth conditions (*Harris and Theriot, 2016, 2018; Si et al.,*  
42 *2019; Ojkic et al., 2019; Zheng et al., 2020; Ghusinga et al., 2016*) (Figure 1B). Instead, a different,  
43 chromosome-independent process, the accumulation of a molecule or protein, is thought to trigger  
44 cell division, once copy number reaches a threshold. Evidence comes from the observation that  
45 the size added by cells between birth and division is independent of their size at birth (*Campos*  
46 *et al., 2014; Taheri-Araghi et al., 2015; Amir, 2014*). Further evidence comes from experiments  
47 that demonstrate the independence of this "adder" behavior from perturbations of DNA replica-  
48 tion (*Si et al., 2019*). Different "accumulator" molecules have been suggested – notably cell-wall  
49 precursor molecules (*Harris and Theriot, 2016*), components of the divisome or septum (*Zheng*  
50 *et al., 2020*), or, more specifically, FtsZ proteins (*Si et al., 2019; Ojkic et al., 2019; Serbanescu et al.,*  
51 *2020*). However, whether cells effectively measure a constant size increase, whether the adder  
52 behavior emerges through the accumulation of a single molecule, and/or whether chromosome  
53 replication/segregation have a direct influence on cell division remains controversial (*Witz et al.,*  
54 *2019; Si et al., 2019; Zheng et al., 2020*).

55 A third model developed by some of us proposes that two processes limit cell division, DNA  
56 replication/segregation and a second "inter-division" process that relates cell size at division to cell  
57 size at birth, independently of DNA replication or segregation (*Micali et al., 2018b,a*) (Figure 1C). The  
58 inter-division process could be the accumulation of a molecule produced since birth, as summarized  
59 above. According to this "concurrent-cycles" model, the slowest process sets the timing of cell  
60 division at the single-cell level. Based on recent experimental evidence (*Si et al., 2019; Witz et al.,*  
61 *2019*), DNA-replication initiation is controlled through an adder-like process between subsequent  
62 initiation events, which could also stem from a molecule accumulating during replication events (*Ho*  
63 *and Amir, 2015; Sompayrac and Maaloe, 1973*).

64 *Micali et al.* showed that single-cycle models proposed (*Wallden et al., 2016; Ho and Amir, 2015;*  
65 *Harris and Theriot, 2016*) fail to explain experimental data on the B and C+D subperiods in single  
66 cells, while the concurrent-cycles model is able to fit the previously available experimental datasets  
67 (*Micali et al., 2018b,a*). However, the model makes assumptions about the nature of the underlying  
68 processes and has more fit parameters than any of the more simple previous models. In this  
69 situation, relevant perturbations could help us validate competing scenarios that are not simple to  
70 discern from single cells growing and dividing in standard conditions.

71 To test single- vs concurrent-processes models of division control, we aimed to force one of the  
72 two potentially limiting processes, the replication-independent inter-division process, to be more  
73 likely limiting for division control. *Zheng et al. (2016)* showed that increasing cell width through  
74 titration of the MreB-actin cytoskeleton causes an increase of the period between replication  
75 termination and cell division (D period) without affecting the average duration of DNA replication (C  
76 period) or cell-cycle duration (see also *Si et al. (2017)*). We hypothesized, that an increased D period  
77 might correspond to a decreasingly limiting role of DNA replication and an increasingly limiting role  
78 of the inter-division process for cell division.

79 Similar to (*Zheng et al., 2016*), we thus systematically increased cell width through perturbations  
80 of the MreB actin cytoskeleton. We then followed single-cell division and DNA replication in  
81 microfluidic devices during steady-state growth conditions in minimal media, similar to previous  
82 work (*Wallden et al., 2016; Si et al., 2019; Witz et al., 2019*).

83 Indeed, upon increasing D period, cell size at division showed continuously decreasing correla-  
84 tions with cell size at initiation of DNA replication. Without any modeling, these findings already  
85 suggest that cell division is controlled by a process different from DNA replication but dependent  
86 on cell size at birth. On the contrary, in non-perturbed cells, DNA replication appears to have an  
87 important limiting role, as supported by the high correlations between division size and size at  
88 replication initiation also observed previously (*Witz et al., 2019*). By testing two recently proposed  
89 single-process models (*Si et al., 2019; Witz et al., 2019*) and the concurrent-process model from  
90 *Micali et al.*, we found that only the concurrent-process model is able to describe the experimental  
91 data in both perturbed and unperturbed conditions.

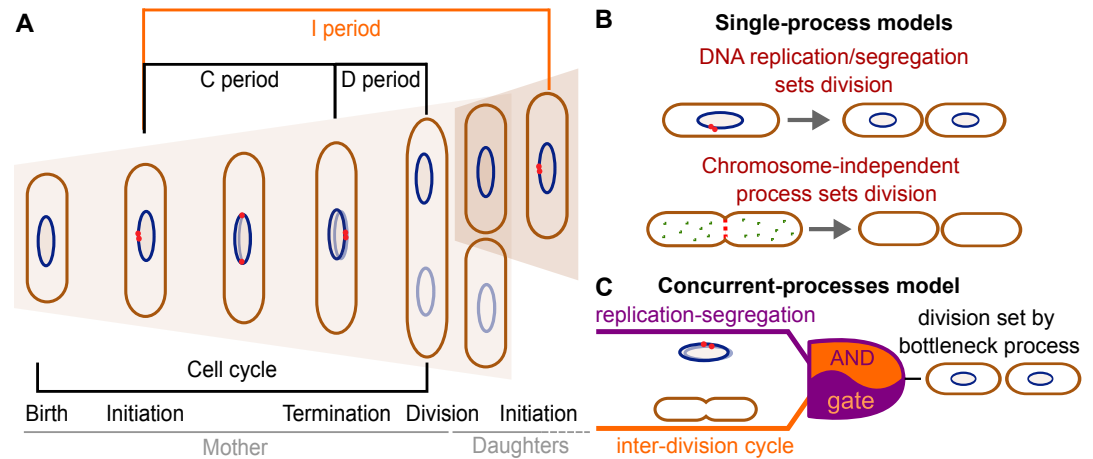

**Figure 1. Different models have been suggested for cell-division control.** **A:** Cartoon of the cell cycle and definition of C, D and I periods. The C period is the time between initiation and termination of chromosome replication, the D period is the time between replication termination and division, and the I period is the time between subsequent initiations. **B:** Models of cell-division control based on a single limiting process. According to the first set of models cell division is controlled by DNA replication and subsequent segregation (Witz *et al.*, 2019; Ho and Amir, 2015; Sompayrac and Maaloe, 1973). According to the second set of models, cell division is controlled by a chromosome-independent inter-division process between birth and division (Si *et al.*, 2017, 2019; Harris and Theriot, 2016, 2018). **C:** Scheme of the concurrent-processes model. According to this model, the time of cell division is set by the slowest of two process, an inter-division process and chromosome replication/segregation. When both processes are completed, the cell can go through division (analogous to an AND gate).

92 In summary, our work suggests that cell division is controlled by at least two concurrent pro-  
 93 cesses that link cell division to DNA replication and cell birth, respectively.

## 94 Results

### 95 Tracking DNA replication during steady-state growth in microfluidic channels

96 To investigate division control in the model organism *E. coli*, we measured cell division and DNA repli-  
 97 cation at the single-cell level using a modified wildtype strain (NCM3722,  $\lambda::P_{127}\text{-mCherry}$ , *dnaN::Ypet-*  
 98 *dnaN*), which contains a cytoplasmic mCherry marker for accurate measurements of cell dimensions  
 99 and a functional fluorescent-protein fusion to the beta-clamp of the DNA-replication machinery  
 100 (YPet-DnaN), introduced at the native *dnaN* locus (Reyes-Lamothe *et al.*, 2010) (Figure 2B). The  
 101 YPet-DnaN fusion forms foci at the replication fork during DNA replication but is diffuse otherwise  
 102 (Figure 2A) (Reyes-Lamothe *et al.*, 2010; Moolman *et al.*, 2014). To investigate cells during exponen-  
 103 tial, steady-state growth conditions, we grew cells in microfluidic devices commonly referred to as  
 104 'mother machines' (Figure 2A), similar to previous experiments (Wang *et al.*, 2010; Long *et al.*, 2013,  
 105 2014; Si *et al.*, 2019; Witz *et al.*, 2019). To reliably distinguish subsequent rounds of DNA replication,  
 106 we grew cells in minimal medium (M9+NH<sub>4</sub>Cl+glycerol), such that subsequent replication rounds  
 107 do not overlap.

108 We segmented single cells using the Oufti cell-segmentation tool (Paintdakhi *et al.*, 2016) and  
 109 constructed cell lineages using the Schnitzcells package (Young *et al.*, 2012). We then used cell length  
 110 as a robust proxy for cell size, and the YPet-DnaN signal to measure periods of DNA replication  
 111 (Figure 2 - Figure Supplement 1). In unperturbed cells we found an average C period of  $51 \pm 1$  min  
 112 and a D period of  $22 \pm 4$  min (Supplementary File 1), in agreement with previous bulk measurements  
 113 (Michelsen *et al.*, 2003).

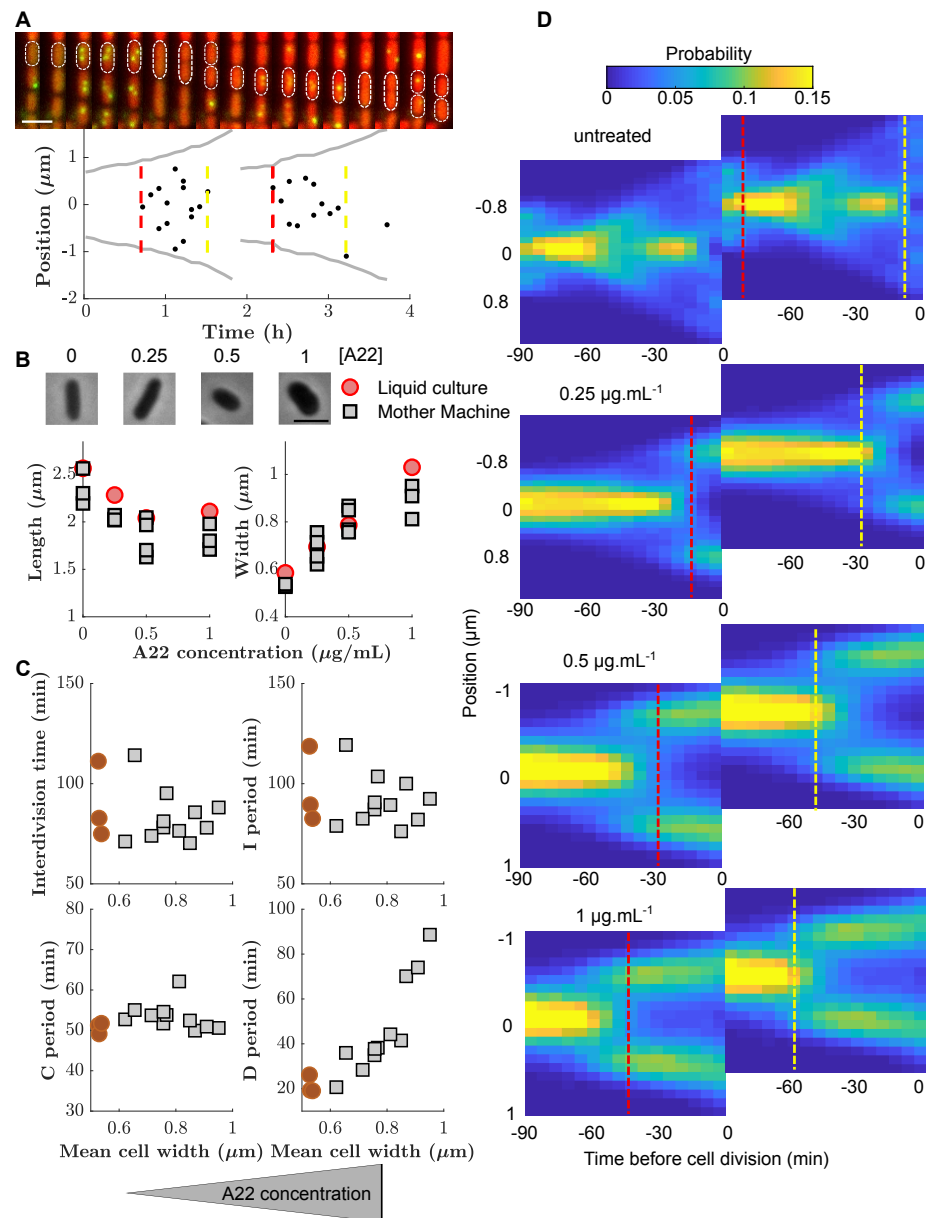

**Figure 2. Increasing cell width through A22 increases the D period.** **A:** Top: Snapshots of a single mother-machine channel taken every 15 min. Red: cytoplasmic mCherry, yellow: YPet-DnaN. The contours show a cell growing for two consecutive cell cycles. Bottom: Cell length (grey line), the position of YPet-DnaN foci along the long axis of the cell (black dots), initiation and termination times (red and yellow dashed lines, respectively). Scale bar: 2  $\mu\text{m}$ . **B:** Top: Snapshots of *E. coli* S233 (NCM3722,  $\lambda$ ::*P-mcherry*, *dnaN*::*Ypet-dnaN*) treated with sublethal amounts of A22 (concentrations in  $\mu\text{g}\cdot\text{mL}^{-1}$ ). Scale bar: 2  $\mu\text{m}$ . Bottom: Effect of A22 treatment on average dimensions of cells grown in liquid or in mother machine for at least 6 hours of exponential growth. **C:** Duration of inter-division time, I, C and D periods as a function of average cell width measured in mother machines. Circles (red) and squares (grey) represent unperturbed conditions and A22-treatment, respectively. Each symbol represents an independent biological replicate. **D:** Conditional probability density of the occurrence of YPet-DnaN foci  $p(y|t)$  as a function of cell length ( $y$ -axis) for different time points before subsequent cell division ( $x$ -axis) for different A22 concentrations as indicated on top of the maps. Maps are duplicated for better visualization of the replication process. Vertical lines indicate the beginning and end of the probability peaks that correspond to replication initiation and termination, respectively. Note that these times do not strictly agree with average replication/termination times.

## 114 **A systematic increase of cell width through the MreB-polymerization inhibitor A22** 115 **causes an increased D period**

116 The concurrent-cycles model (*Micali et al., 2018b*) suggests that DNA replication and a replication-  
117 independent inter-division process are equally likely to limit the timing of cell division under  
118 unperturbed conditions. To test the model, and more generally the presence of two concurrent  
119 cycles, we aimed to make one of the two processes more limiting. Specifically, we speculated that  
120 the inter-division process might become the sole limiting process if the average duration between  
121 replication termination and division (D period) could be increased. Based on previous work by  
122 (*Zheng et al., 2016*), we therefore systematically increased cell width by perturbing the MreB-actin  
123 cytoskeleton (Figure 2B). Instead of titrating MreB levels (*Zheng et al., 2016*) we treated cells with  
124 sub-inhibitory concentrations of the MreB-polymerization inhibitor A22 (*Bean et al., 2009*), similar  
125 to previous studies (*Tropini et al., 2014*).

126 Increasing A22 concentration leads to increasing steady-state cell width both in batch culture  
127 and in the mother machine (Figure 2B), but does not affect doubling time (Figure 2C) or single-cell  
128 growth rate (Figure 2 - Figure Supplement 2). Furthermore, growth-rate fluctuations remain constant  
129 (Figure 2 - Figure Supplement 3) and similar to previous measurements (*Kennard et al., 2016*;  
130 *Grilli et al., 2018*).

131 In line with the results of (*Zheng et al., 2016*), the increase of cell width leads to an increase in  
132 the average D period (Figure 2C) as hypothesized. At the same time, the average C period (Figure  
133 2C) and the average cell volume at the time of replication initiation remain unperturbed (Figure  
134 2 - Figure Supplement 4), as previously reported (*Zheng et al., 2016*). While these periods are  
135 extracted from single-cell lineages, the shift of replication to earlier times is also observed in the  
136 probability distributions of replicase positions (Figure 2D), where periods of both early and late  
137 replication appear as marked foci. Due to the increased D period at high A22 concentrations, cells  
138 start replication already in the mother cell on average.

## 139 **Increasing D period through A22 leads to decreasing correlations between DNA** 140 **replication and cell division**

141 In view of the previously suggested concurrent-cycles model (*Micali et al., 2018b*) we speculated  
142 that DNA replication might not be limiting for cell division if the D period was increased, while  
143 a replication-independent inter-division process might become the sole limiting process for cell  
144 division. Alternatively, as previously suggested (*Zheng et al., 2016*), replication could still be the  
145 limiting process determining the timing of cell division, for example through a width-dependent  
146 added size between replication initiation and subsequent cell division (*Witz et al., 2019*).

147 The coupling between cell size and cell growth over different cell-cycle subperiods can be  
148 quantified in different ways (*Jun and Taheri-Araghi, 2015*; *Osella et al., 2017*; *Cadart et al., 2019*).  
149 For convenience, and following (*Jun and Taheri-Araghi, 2015*; *Micali et al., 2018b*; *Si et al., 2019*;  
150 *Ho and Amir, 2015*), we quantified behavior during different sub-periods using 'adder plots', which  
151 display the added size during the period *versus* the initial size, both normalized by their means.  
152 We refer to the slope of these plots as "coupling constants"  $\zeta_X$ , where  $X$  denotes the respective  
153 sub-period. A coupling constant of 0 corresponds to adder behavior. A coupling constant of 1  
154 corresponds to a 'timer' process, that is a process that runs for a constant duration on average,  
155 independently of cell size at the beginning of the period, and a coupling constant of  $-1$  corresponds  
156 to a process where the final size is independent of the size at the beginning of the period (see  
157 Materials and Methods).

158 First, we measured the added size between birth and division. In agreement with previous results  
159 (*Campos et al., 2014*; *Taheri-Araghi et al., 2015*), untreated cells showed "adder behavior", that is,  
160 the added size between birth and division is independent of birth size  $L_0$ , with a coupling constant  
161 (or slope) of  $\zeta_G = -0.046 \pm 0.085$  (Figure 3A). Here, the uncertainty denotes the standard deviation  
162 between biological replicates (Supplementary File 1). With increasing D period duration (through

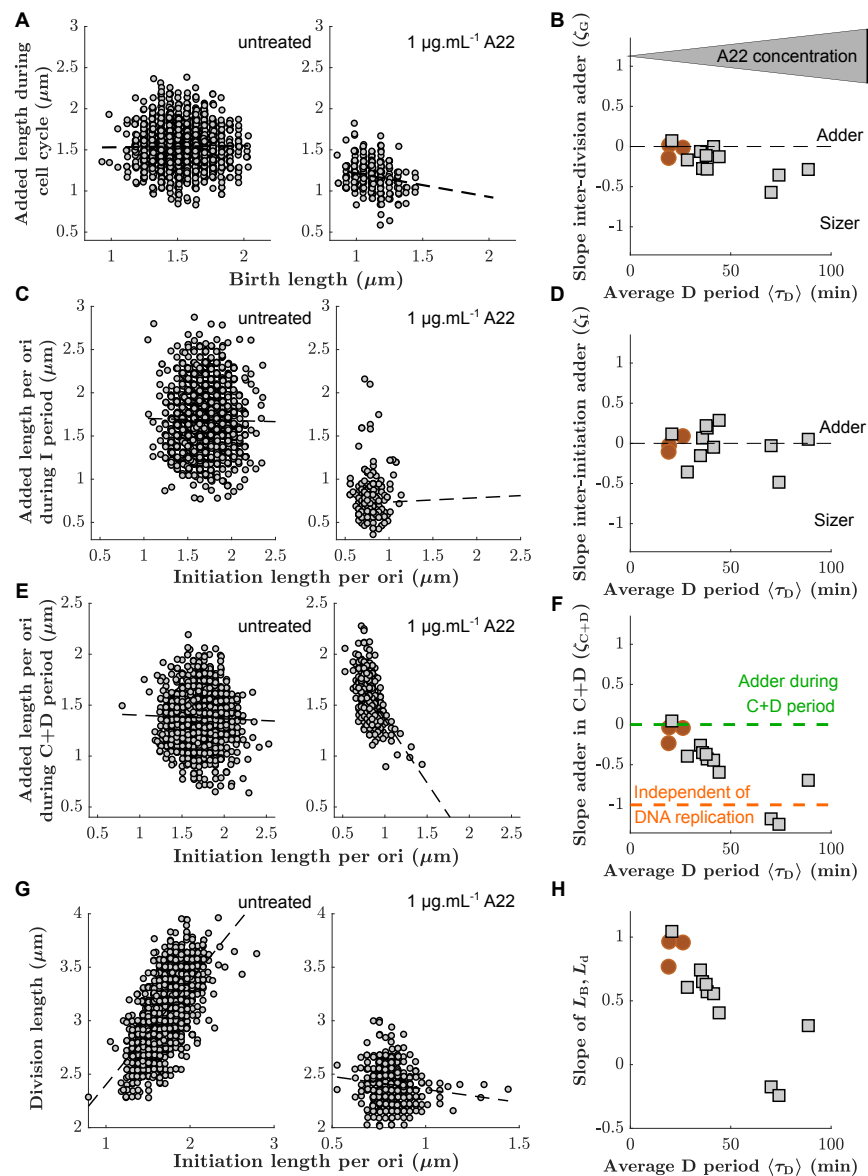

**Figure 3. Single-cell correlations between division and DNA replication events.** **A,C,E:** Added size between birth and division (**A**), between subsequent events of replication initiation (**C**), and during the C+D period (**E**), for untreated cells (left) and cells treated with  $1 \mu\text{g}\cdot\text{mL}^{-1}$  A22 (right). Points represent single cells. Dashed lines represent robust linear fits. All lengths are indicated in units of  $\mu\text{m}$ . **B,D,F:** Slopes of the added sizes corresponding to A, C, D, respectively, as a function of the D period as obtained through sub-lethal A22 treatment ( $0-1 \mu\text{g}\cdot\text{mL}^{-1}$ ). A slope of 0 represents adder behavior, while a slope of  $-1$  represents independence on the size at the beginning of the sub-period (sizer behavior). Circles (red) and squares (grey) represent unperturbed conditions and A22-treatment, respectively. Each symbol represents an independent biological replicate. **G,H:** Division size  $L_d$  as a function of initiation size per ori  $L_B/n_{\text{Ori}}$  (**G**) and corresponding slopes (**H**) in analogy to panels A, B, respectively. The decreasing slope in **H** demonstrates decreasing dependency of division on DNA replication.

163 increasing A22 concentration), cells continued to show near-adder behavior with a weak trend  
 164 towards sizer behavior (Figure 3B). For single-cell point clouds of intermediate A22 concentrations  
 165 see Figure 3 - Figure Supplement 1. Similarly, cells also show adder behavior between subsequent  
 166 rounds of replication initiation (Figure 3C). More specifically, cells add a constant size per origin  
 167 of replication between subsequent rounds of initiation, independently of initial initiation size  
 168 ( $\zeta_I = -0.013 \pm 0.098$ ). This behavior is robust with respect to variations of average growth rate

169 using a poorer growth medium (Figure 3 - Figure Supplement 2). For unperturbed cells, this  
 170 behavior was previously proposed theoretically (*Ho and Amir, 2015; Sompayrac and Maaloe, 1973*)  
 171 and demonstrated experimentally (*Si et al., 2019; Witz et al., 2019*). We found that  $\zeta_I$  is constant,  
 172 independently of A22 treatment (Figure 3D). Together with the constancy of the average initiation  
 173 volume (Figure 2 - Figure Supplement 4, *Ho and Amir (2015); Si et al. (2017); Zheng et al. (2016)*) this  
 174 suggests that the process of replication initiation is not affected by the A22-induced cell widening.

175 In contrast to the weak dependency of  $\zeta_G$  and  $\zeta_I$  on drug treatment, correlations between  
 176 initiation size and corresponding cell division systematically change as a function of average D  
 177 period (Fig 3G-H). While unperturbed cells effectively show adder behavior ( $\zeta_{CD} = -0.10 \pm 0.11$ , Figure  
 178 3E), in agreement with the analysis of previous experimental data (*Micali et al., 2018b; Witz et al.,*  
 179 *2019*),  $\zeta_{CD}$  continuously changes towards a value of  $-1$  with increasing average D period (Figure 3F).  
 180 This trend signifies that division is decreasingly dependent on DNA-replication. This independence  
 181 can also be illustrated differently: Division size is decreasingly dependent of the size at initiation  
 182 with increasing D period (Figure 3H). From these observations, we conclude that with increasing  
 183 average D period a process different from DNA replication is likely increasingly responsible for  
 184 division control.

### 185 A replication-independent adder-like process is increasingly likely the bottleneck 186 process for cell division

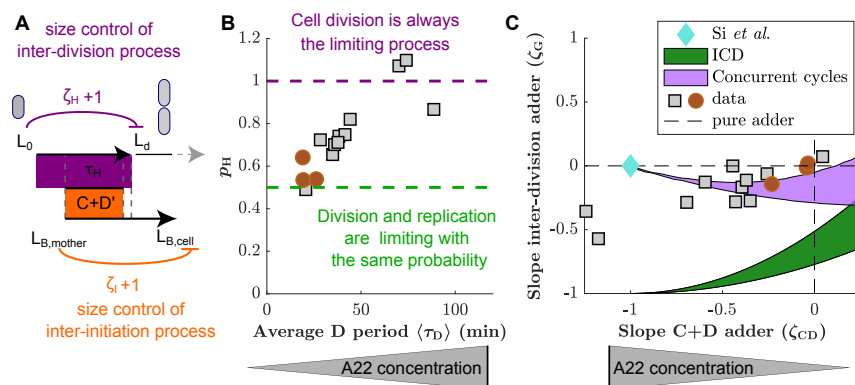

**Figure 4. Experimental validation of the concurrent cycles model.** **A:** Cartoon: Two independent inter-division and timer-like replication/segregation processes with control parameters  $\zeta_H$  and  $\zeta_{CD'} = 1$ , respectively, must be completed before division occurs. The adder-like inter-initiation processes with control parameter  $\zeta_I = 0$  determines size at initiation. **B:** Model-fitting to experimental data reveals the probability  $p_H$  of the inter-division process to control cell division as a function of increasing D period (with increasing A22 concentration), assuming constant control parameters  $\zeta_H = 0$ ,  $\zeta_{C+D'} = 0$ ,  $\zeta_I = 0$ . **C:** Slopes of adder plots  $\zeta_G$  as a function  $\zeta_{CD}$ . Blue diamond: prediction in *Si et al. (2019)*. Dotted lines: Prediction of pure adder models. Green: Prediction from a general class of single-process chromosome-limited models ("ICD" models, see Supplementary Notes) (*Micali et al., 2018b*), where cells divide after completion of the replication/segregation process with variable  $\zeta_{CD}$ . Purple: Prediction of the concurrent cycles model. Shaded areas represent the ranges of predictions using the maximum and minimum experimentally measured input parameters (ratio of variance of size at initiation over size at birth; ratio of mean size at division over size at birth). **B, C:** Circles (red) and squares (grey) represent unperturbed conditions and A22-treatment, respectively. Each symbol represents an independent biological replicate.

187 As described in the introduction, a range of different single-process models were proposed in  
 188 the past to explain correlations between DNA replication and cell division (*Si et al., 2019; Harris*  
 189 *and Theriot, 2016; Witz et al., 2019; Wallden et al., 2016; Ho and Amir, 2015*). Some of us recently  
 190 argued that existing single-process models are incapable to reconcile correlations observed in  
 191 previous experimental datasets (*Micali et al., 2018b,a*), which led us to propose the concurrent  
 192 cycle scheme illustrated in Figure 4A. The model assumes two processes that must both finish  
 193 for cell division to occur, one replication/segregation process related to the size at replication

194 initiation and one inter-division process related to the size at birth. The model contains three  
195 control parameters:  $\zeta_{CD}$  controls the replication/segregation process and  $\zeta_H$  controls the inter-  
196 division process. A third parameter,  $\zeta_I$  controls the inter-initiation process that relates replication  
197 initiation to the cell size at the previous initiation. The slopes of the inter-division period ( $\zeta_G$ ) and  
198 of the C+D period ( $\zeta_{CD}$ ) emerge from the competition of the two cycles and are predictions of the  
199 model.

200 To fit the concurrent-cycles model to our experimental data, we set the inter-initiation process  
201 to be an adder ( $\zeta_I = 0$ ), based on our experimental results (Figure 3C), in agreement with previous  
202 observations in unperturbed cells (*Si et al., 2019; Witz et al., 2019*). Furthermore, we assumed that  
203 replication segregation has a minimum time to be completed which is independent of size at the  
204 time of initiation. For the inter-division process we assumed that  $\zeta_H = 0$  (adder). This assumption is  
205 supported by previous experiments in filamentous cells, transiently inhibited for division (*Wehrens*  
206 *et al., 2018*). Those cells divide following a cell-cycle adder and therefore divide much more  
207 frequently than non-filamentous cells, likely because DNA replication is never limiting. The adder  
208 hypothesis is also compatible with the accumulation models of FtsZ or other divisome/septum  
209 components for this sub-period, as recently hypothesized *Si et al. (2019); Zheng et al. (2020); Ojkic*  
210 *et al. (2019)*.

211 Compared to a single-process model, this framework outputs the extra parameter  $p_H$ , which  
212 quantifies the probability that the inter-division process is limiting. Figure 4B shows how by fitting  
213 the model to our data, increasing D period duration leads to an increase of  $p_H$ . The model therefore  
214 predicts that the two independent processes, DNA replication and a replication-independent inter-  
215 division process, are almost equally likely to limit cell division under unperturbed conditions (*Micali*  
216 *et al., 2018b*). However, with increasing average D period, the replication-independent inter-division  
217 process is increasingly likely limiting for cell division.

218 In a generalized framework, we also allowed the inter-division control parameter  $\zeta_H$  to vary,  
219 fitting  $\zeta_H$  and  $p_H$  simultaneously, at the cost of an extra parameter. We found that  $\zeta_H$  decreases  
220 mildly from an adder-like behavior towards a sizer with increasing average D period (Figure 4 -  
221 Figure Supplement 1B).  $p_H$  increases with the D period regardless of the fitting strategy (Figure  
222 4 - Figure Supplement 1A).

223 Two recent studies have proposed single-process models based on new experimental data: First,  
224 a chromosome-limited model that links replication and subsequent division through an adder pro-  
225 cess (*Witz et al., 2019*), which is the best-fitting model of a whole class of models where replication  
226 is limiting and initiation is set by an adder ("ICD" models, see Supplementary Notes) and second,  
227 a chromosome-agnostic model that considers replication and division processes as independent  
228 of one another (*Si et al., 2019*). We therefore tested the performance of both of these models on  
229 our experimental data of unperturbed cells, by jointly comparing the predicted couplings of the  
230 inter-division period and the C+D period. We found that both frameworks appear to be incompati-  
231 ble with our data (Figure 4C). We also verified that the concurrent-cycles scenario generally shows  
232 better agreement with recently published data in the literature than single-process models (Figure  
233 4 - Figure Supplement 3). *Witz et al. (2019)* argued that their single-process model could reconcile  
234 adder behavior based on asymmetric cell division (see also their recent comment in (*Witz et al.,*  
235 *2020*)). For simplicity and analytical tractability, we did not include asymmetric division in the general  
236 models shown in Figure 4C, but we analyzed its role separately in Figure 4 - Figure Supplement 2.  
237 We also observed that in the model proposed by *Witz et al. (2019)*, asymmetric division drives  
238 the inter-division control  $\zeta_G$  towards an adder-like process, reaching adder behavior for division  
239 asymmetries that are similar to experimentally observed values (Figure 4 - Figure Supplement 2).  
240 However, this model does not allow  $\zeta_{CD}$  to deviate from an adder, thus resulting in a poor agreement  
241 upon perturbation of cell width (Figure 4 - Figure Supplement 5).

242 The predictions of Figure 4C rely on analytical calculations performed in the limit of small  
243 noise. To verify that the levels of cell-to-cell variability would not affect the results, we tested the  
244 predictions of our model with simulations at the experimentally observed levels of noise, and as a



245 function of noise levels. Figure 4 - Figure Supplement 4 shows by direct model simulation that the  
246 predictions are robust.

## 247 Discussion

248 In conclusion, our study suggests that cells control the timing of cell division based on at least two  
249 processes in slow-growth conditions: genome replication/segregation and an inter-division process,  
250 which relates cell division to size at birth. Accordingly, experimental data obtained in this study and  
251 in previous studies are well described by the concurrent-cycles model, while the available single-  
252 process models fail to describe our experimental data in unperturbed and perturbed conditions.

253 Our conclusions are based on the following observations: First, cell size at division and cell size  
254 at initiation of DNA replication are correlated in unperturbed cells ( $\zeta_{CD} = 0$ , Figure 3), as already  
255 observed previously (*Micali et al., 2018b,a; Witz et al., 2019*). Thus, division and replication cannot  
256 proceed fully independently of one another, as previously suggested (*Si et al., 2019*). But why  
257 can DNA replication alone not account for division control as suggested by *Witz et al. (2019)*, in  
258 form of an adder between replication initiation and division? When increasing cell width and the  
259 average D period with A22, we observed decreasing correlations between DNA replication and  
260 division (a decrease of  $\zeta_{CD}$  towards  $-1$ ) (Figure 3), which suggests that division becomes decreasingly  
261 dependent of replication. At the same time, two other key cell-cycle couplings remained nearly  
262 unchanged ( $\zeta_G \approx 0$ ,  $\zeta_I \approx 0$ ). Our data are in line with the idea that a replication-independent process  
263 related to size at birth contributes to division control, and that this process is dominant upon  
264 width perturbations. Thus, cell division is apparently affected by both cell size at birth and DNA  
265 replication.

266 What is the process that links cell division to size at birth? The concurrent-cycles model sug-  
267 gests that the inter-division process is an adder-like process ( $\zeta_H \approx 0$ ), which shows a mild trend  
268 towards sizer with increasing perturbation. The adder-like nature of this process is also supported  
269 by experiments with dividing filamentous cells, where DNA replication is likely never limiting cell  
270 division (*Wehrens et al., 2018*). Recently, multiple studies suggested that cells divide independently  
271 of DNA replication, based on a licensing molecule that accumulates since birth and reaches a critical  
272 threshold in copy number at the time of cell septation or division (*Si et al., 2019; Zheng et al., 2020;*  
273 *Ojkic et al., 2019; Harris and Theriot, 2016; Panlilio et al., 2020*). The licensing molecules were  
274 suggested to be cell-wall precursor molecules (*Harris and Theriot, 2016*), FtsZ or other division-  
275 ring components (*Si et al., 2019; Ojkic et al., 2019; Serbanescu et al., 2020*), or other unknown  
276 molecules (*Zheng et al., 2020*). The peptidoglycan accumulation model is based on the assumption  
277 that peptidoglycan accumulates in proportion to cell volume, while cell-wall insertion occurs in  
278 proportion to cell-surface growth. However, some of us recently demonstrated that cell surface  
279 area grows in proportion to biomass (*Oldewurtel et al., 2019*), which makes it more likely that  
280 peptidoglycan synthesis and cell-wall insertion happen at equal rates. FtsZ or a different septum  
281 component are possible candidates for the inter-division mechanism. Cell size at z-ring formation  
282 correlates with total FtsZ abundance (rather than FtsZ concentration) (*Männik et al., 2018*). Further-  
283 more, controlled repression or over-expression of FtsZ delay or accelerate subsequent cell division  
284 (*Si et al., 2019*). However, at the same time, the expression of FtsZ is cell-cycle dependent (*Männik*  
285 *et al., 2018*). Whether the accumulation of FtsZ or other divisome components are responsible for  
286 an adder-like inter-division process thus requires further investigation.

287 *Si et al. (2019)* recently conducted periodic expression/repression experiments of FtsZ, the  
288 mentioned septum component, and DnaA, the major replication-initiation protein, which led them  
289 to conclude that replication and division were independent of each other. While their experiments  
290 are suggestive of a role of cell size at birth for subsequent cell division, their data do not rule out  
291 an additional limiting role of DNA replication for division, which is supported by the adder-like  
292 correlations observed between replication initiation and division (Figure 3; *Witz et al. (2019)*).

293 How is cell division mechanistically coupled to DNA replication? Z-ring formation and DNA  
294 segregation are coupled through the processes of nucleoid occlusion, which inhibits Z-ring formation

295 on top of nucleoids, and *ter* linkage, a process that links the Z-ring to the terminal region of the  
296 segregated chromosomes (*Dewachter et al., 2018*). Another link in slow-growth conditions comes  
297 from FtsZ expression: FtsZ-protein expression increases in a step-wise manner during the cell  
298 cycle (*Männik et al., 2018*), and Z-ring formation happens predominantly after the increase of  
299 production (*Männik et al., 2018*). However, which of these or other processes is coupling the timing  
300 of replication to division remains to be determined.

301 Based on the concurrent-cycles model we predict that inter-division and DNA replication/segregation  
302 processes are equally likely limiting cell division ( $p_H \approx 0.5$ ) in two different growth media (Figure  
303 3 - Figure Supplement 2), and we previously reported the same balance (*Micali et al., 2018b*) for  
304 previous experiments at slow growth (*Adiciptaningrum et al., 2015; Wallden et al., 2016*). This  
305 balance is surprising, as it requires that both processes terminate, on average, at the same cell  
306 volume  $2 \langle V_0 \rangle$ . Under balanced conditions, average cell size after completion of the inter-division  
307 and replication/segregation processes are given by  $\langle V_0 + \Delta_H \rangle \approx 2 \langle \Delta_H \rangle$  and  $2\Delta_I 2^{(C+D)/\tau}$  (*Ho and Amir,*  
308 *2015*), respectively. With  $\Delta_I$  constant,  $\Delta_H$  must therefore scale in proportion to  $2^{[(C+D)/\tau]} \approx 2^{[(C+D)/\tau]}$ .  
309 What could be responsible for this scaling?

310 *Zheng et al. (2020)* recently re-investigated average cell size and the duration of the C+D period  
311 as a function of nutrient-dependent growth rate. While it was previously thought that cell size  
312 increases exponentially with growth rate (*Schaechter et al., 1958*), *Zheng et al. (2020)* identified a  
313 linear relationship. Similarly, they found that the average C+D period shows a Michaelis-Menten-like  
314 relationship ( $C+D = \mu/(a\mu + b)$ ) with average growth rate  $\mu$ . Based on these experimental findings  
315 they suggested an accumulator model (equivalent to our H-process) that could reconcile the growth-  
316 rate dependent increase of average cell size, as long as the threshold molecule was produced at  
317 a rate proportional to  $1/(C + D)$  on average. Recent theoretical work supports this relationship  
318 (*Serbanescu et al., 2020*) based on the assumption of constitutive divisor expression. The same  
319 assumption also finds some experimental validation from nutrient-shift data (*Panlilio et al., 2020*).  
320 Constitutive divisor-protein expression could provide an explanation for the maintenance of  $p_H$  over  
321 different unperturbed conditions. However, as soon as only one of the two processes is modulated,  
322 for example through width perturbations (Figure 4), their balance is broken.

323 The concurrent-cycles framework assumes that replication initiation is independent of cell divi-  
324 sion or cell size at birth, based on the robust measurements of adder behavior between subsequent  
325 initiations (Figure 3C). However, we note that this is not the only possibility. A complementary  
326 hypothesis (*Kleckner et al., 2018*) posits a possible (additional or complementary) connection of  
327 initiation to the preceding division event. This scenario still needs to be explored.

328 In conclusion, cell-cycle regulation remains to be understood mechanistically. However, from  
329 our work it appears that in standard conditions both DNA replication and cell growth since birth  
330 play important roles for division timing.

## 331 Materials and Methods

### 332 Strain construction

333 All experiments were carried out with *E. coli* strain S233 (NCM7322,  $\lambda::P\text{-mcherry}, dnaN::Ypet\text{-}dnaN$ ).  
334 The strain was obtained by a 2-step phage transduction into the K-12 strain NCM3722 (wildtype)  
335 (*Brown and Jun, 2015; Soupene et al., 2003*). First, we introduced mCherry from MG1655( $\lambda::P_{127}\text{-}$   
336 *mcherry,int,kan*) (*Vigouroux et al., 2018*) via P1 phage transduction, then removed integrase and  
337 kanamycin-resistance cassette using the pE-FLP system (*Saint-Pierre et al., 2013*). The resulting  
338 strain was transduced with P1 phages lysate of strain S227 (*dnaN::Ypet-dnaN,kan*) (*Reyes-Lamothe*  
339 *et al., 2010*), a kind gift from Rodrigo Reyes-Lamothe. Finally, we removed the kanamycin-resistance  
340 cassette using pE-FLP.

## 341 **Chemicals**

342 Unless otherwise indicated, all chemicals used in this study were purchased from Sigma-Aldrich.  
343 MreB perturbing compound A22 was purchased from Cayman Chemicals and was dissolved in  
344 DMSO at a final concentration of 5 mg.mL<sup>-1</sup>. This solution was made every month and stored in  
345 small aliquots not defrosted more than two times. An intermediate solution was freshly prepared  
346 for each new experiment in the corresponding growth medium.

## 347 **Microfluidic chip fabrication**

348 Cell growth was monitored in a microfluidic device for many generations. The device is an adaptation  
349 of the mother machine device (*Wang et al., 2010*) with the difference that channels are opened at  
350 both ends (*Long et al., 2013, 2014*). The design of the device was kindly provided by Pietro Cicuta's  
351 lab. The chips were replicated from epoxy molds by pouring PDMS (Sylgard 184 with 1:10w/w ratio  
352 of curing agent) and by curing it overnight at 60°C. After cutting the chip and punching inlets (with  
353 either a 0.75 mm or 1.5 mm biopsy punch in diameter), the chip was cleaned with scotch tape and  
354 bonded to a cleaned glass coverslip (#1.5 24x60 mm). Glass coverslips were cleaned by one hour  
355 heated sonication in 2% Helmanex soap, rinsing with water, and then one hour heated sonication in  
356 100% ethanol. The slides were kept in 100% ethanol until used and dried with compressed air just  
357 before use. For PDMS bonding to the coverslip, coverslips and PDMS chips were plasma cleaned  
358 (Plasma System Cute, Femtoscience), and the assembled chips were baked at 60°C for at least one  
359 hour.

360 Before loading cells, the device's surface was passivated with Pluronic F-127 (P2443, Sigma)  
361 at 0.085% final concentration (dissolved in sterile PBS) for 5-30 minutes at room temperature.  
362 The device was then rinsed with growth medium. Loading of the cells was done with no prior  
363 centrifugation and with a 5 µm filter attached to the syringe, in order to avoid cells aggregates to  
364 clog the channels. All other reagents and media were filtered with a 0.22 µm filter prior to injection  
365 in the microfluidic chip. Growth medium flowing in the chip was supplemented with BSA (A9418  
366 Sigma, 10 mg.mL<sup>-1</sup> final concentration, dissolved in filtered sterile water).

## 367 **Growth media**

368 All microscopy experiments were done in M9 minimal medium (*Miller, 1972*) supplemented with 1  
369 mM of MgSO<sub>4</sub> (Sigma, M2773) and glycerol (0.2%) as carbon source. If not otherwise indicated we  
370 used NH<sub>4</sub>Cl (19 mM) as nitrogen source. Alternatively, for slower growth, we used Proline (Acros,  
371 AC157620250) (10 mM). The composition of M9 minimal medium is: Disodium Hydrogenophosphate  
372 (Na<sub>2</sub>HPO<sub>4</sub>, S7907, Sigma) (42 mM); Potassium Dihydrogen phosphate (KH<sub>2</sub>PO<sub>4</sub>, P0662, Sigma) (22  
373 mM); Sodium Chloride (NaCl 31434, Sigma) (8.6 mM).

## 374 **Growth conditions**

375 Bacteria were grown at 37°C. For mother machine experiments, a preculture in the selected M9  
376 growth medium was prepared from a single colony on a LB agar plate after streaking from a  
377 glycerol freezer stock. After overnight growth, the culture was back-diluted by a factor 1/50 to  
378 1/100 for growth of 1 to 4 hours at 37°C. The culture was then injected into the mother machine  
379 device for population of the channels during one hour without flow. Subsequently, flow with  
380 M9 medium (supplemented with A22 if indicated) was started using a syringe pump (Harvard  
381 Apparatus). A movie was started at least one hour after starting the flow. We made sure that cells  
382 were growing at steady state in terms of growth rate/length/width for at least six hours. Any of  
383 those quantities were not varying more than 15% during the time course of the experiment (see  
384 Figure 2 - Figure Supplement 2B for the constancy of growth rate).

385 For growth rate measurement in liquid culture and snapshots to measure cell dimensions  
386 a preculture was made in the chosen minimal medium from a glycerol stock streak and grown  
387 overnight at 37°C, as above. In the morning, the culture was back-diluted to an OD of 0.005 and

388 treatment with A22 was started. Cells were grown for one to two hours at 37°C before growth rate  
389 measurements were started. Snapshots were taken after seven hours of A22 treatment.

### 390 **Microscopy**

391 Microscopy was performed on an inverted DeltaVision Elite microscope (GE Healthcare) equipped  
392 with a 100X oil immersion phase contrast objective (UPlanSApo 100X NA = 1.4, Olympus). We used a  
393 laser-based auto-focusing system to maintain focus on the cells throughout the whole course of the  
394 experiment. For fluorescence measurements we used a Fluorescence light source (Lumencor), a  
395 multi-band dichroic beamsplitter (DAPI-FITC-mCherry-Cy5), FITC filter (excitation: 475/28, emission:  
396 525/48) and mCherry filter (excitation: 575/25, emission: 625/45). Parameters for excitation were  
397 10% of light intensity for mCherry, with exposure time of 300 ms and 32% of intensity for YPet, with  
398 exposure time of 300 ms. Images were acquired through a sCMOS camera (DV Elite, PCO-Edge 5.5)  
399 with an effective pixel size of 65 nm was used, with a frame interval of 6 minutes for cells grown  
400 in M9(NH<sub>4</sub>Cl, Glycerol) medium and 8 minutes for cells grown in M9(Proline, Glycerol) medium.  
401 Imaging was done at 37°C in a controlled chamber. Microfluidic flow was controlled with a syringe  
402 pump (Harvard Apparatus).

### 403 **Image analysis**

404 Image analysis was based on published or custom Matlab scripts. Cells were segmented using the  
405 Oufiti package (*Paintdakhi et al., 2016*). Dimensions of cells grown in liquid culture and imaged  
406 on agarose pads were extracted using Oufiti. For cells grown in mother machine channels we  
407 considered all channels that contained cells growing for the whole duration of the experiment.  
408 As the cells are trapped in channels and their long axis is aligned with the channel direction,  
409 we computed cell length as the distance between the two extreme points of the cell contour  
410 (obtained with Oufiti) along the channel axis. We subsequently reconstructed cell lineages using the  
411 Schnitzcells software (*Young et al., 2012*), and we considered only cells with at least four ancestors  
412 for further analysis.

413 Single-cell growth rate was calculated from an exponential fit to cell length as a function of time.  
414 Only cells with positive growth rates and exponential fits with  $R^2$  above 0.8 were kept for analysis.

415 For our statistical analysis of replication-division coupling, we considered triplets of cells (a  
416 cell associated with its mother and its grandmother). This allowed us to follow two subsequent  
417 replication cycles and the corresponding events of cell division (a C+D period after initiation), even  
418 if replication initiation started more than one generation time before division.

419 To obtain average time points of replication initiation and termination, we generated probability-  
420 density maps  $p(z/L, t - t_d)$  of finding a DnaN-Ypet spot at a position  $z$  along the cell axis (normalized  
421 by cell length  $L$ ) at a time  $t - t_d$  before cell division (Figure 2C). To that end we identified fluorescent  
422 spots of Ypet-DnaN: First, a bandpass filter was applied to the YPet fluorescence image (Matlab  
423 function *bpass* with 0.8 px and 20 px for the characteristic length scales of noise and objects,  
424 respectively). We then considered all local intensity maxima (Matlab function *regionprops*) inside cell  
425 contours with peak intensity above a manually defined threshold. We then obtained the average  
426 time points of initiation/termination as as inflection points along the x-axis in probability density  
427 maps (see Figure 2C).

428 For the detection of DNA-replication initiation and termination in single cells we did not consider  
429 spots but took advantage of the heterogeneous Ypet signal during replication (as illustrated in  
430 Figure 2 - Figure Supplement 1). After bandpass filtering of the YPet image, we subtracted the  
431 median intensity  $I_{\text{med}}$  for every pixel and took the sum:  $I_{\text{tot}} = \sum_i (I_i - I_{\text{med}})$ , where  $i$  runs over all  
432 pixels inside the cell contour. We divided triplets of cells into two mother-daughter pairs. In each  
433 pair, we aimed to identify a complete round of replication that is most recently terminated before  
434 before the division of the respective daughter cell. Prior to single-cell analysis, limits for initiation  
435 frame and termination frame were obtained from the probability density maps (Figure 2C, Figure  
436 2 - Figure Supplement 1). Replication/termination was allowed to happen up to 11 time frames (of 6

437 or 8 min, depending on growth medium) before or after the average time of replication/termination.  
438 In each mother-daughter pair, we then identified regions with  $I_{\text{tot}} > 0$  of a duration of at least 25  
439 min as potential rounds of replication. We then identified the largest region with both initial and  
440 final time points within the respective time windows defined above (Figure 2 - Figure Supplement 1).  
441 We allowed the D period to be equal to zero if no replication is detected in the two first frames of  
442 the two daughter cells. Following this protocol, we identified replication periods in almost all cells  
443 (see Supplementary File 1).

#### 444 Estimation of adder slopes

445 To measure the added length per ori between subsequent replication initiation events and between  
446 replication initiation and subsequent division, respectively, we first calculated an ori-normalized  
447 length  $L^*$ . To that end, we divided the length of the mother and grandmother cells by two and  
448 four respectively. The added length per ori between initiations is then obtained as  $\Delta_I = L^*(r_B^{\text{cell}}) -$   
449  $L^*(r_B^{\text{mother}})$ , irrespectively of whether initiation events happen in cell, mother, or grandmother.  
450 Similarly, the added length between replication and subsequent division is obtained as  $\Delta_{C+D} =$   
451  $L^*(r_d^{\text{cell}}) - L^*(r_B^{\text{cell}})$ . Here, we implicitly assumed symmetric cell division, since division asymmetry  
452 is small (5%) in all our experiments (Fig. 4 - Figure Supplement 2). To test for the influence of  
453 division asymmetry on the adder slopes, we corrected the added lengths for the asymmetries of  
454 grandmother-mother and mother-cell division events. For example, to correct for the asymmetry in  
455 the calculation of the inter-initiation added length, if subsequent initiations happen in mother and  
456 daughter cell, we obtain  $\Delta_I^{\text{asym}} = \Delta_I + (1 - \alpha)L_d^*$ , where  $L_d^*$  is the ori-normalized length of the mother  
457 cell at division, and where  $\alpha = (L_0^{\text{sibling}} - L_0) / (L_0^{\text{sibling}} + L_0)$  is the division asymmetry between the  
458 daughter cell with birth length  $L_0$  and its sibling with birth length  $L_0^{\text{sibling}}$ . Comparing the simple  
459 and the more accurate calculation revealed no significant difference for both I and C+D periods,  
460 respectively (Figure 4 - Figure Supplement 2).

461 Adder slopes were estimated from a robust fit on the cloud of points using iteratively re-weighted  
462 least squares (Matlab, *robustfit* function) to avoid the contribution of occasional outliers. Detailed  
463 sample sizes for each experiment are listed in Supplementary File 1.

#### 464 Mathematical linear-response formalism for adder coupling constants of cell-cycle 465 subperiods

466 In this section we present the mathematical framework used in this work to quantify the size control  
467 during different cell-cycle subperiods, and to compare experimental results with predictions from  
468 different theoretical models. Specifically, this framework provides us with relationships between the  
469 slopes of the different adder plots (Figure 3) that must be met by experimental data to support a  
470 given model. Thus, the relationships provide a powerful validation/falsification tool for the different  
471 models available.

472 The original formalism presented in ref. (*Micali et al., 2018a*) is based on the so-called “size-  
473 growth plots” (*Turner et al., 2012; Chandler-Brown et al., 2017; Grilli et al., 2018*), whose slope ( $\lambda$ )  
474 quantifies the correlation between (logarithmic) size and (logarithmic) multiplicative growth. Here  
475 we adopt an equivalent variant of the formalism based on the slope ( $\zeta$ ) of “adder plots”, which  
476 relate the added size over a subperiod to initial size (size at the beginning of the subperiod) (*Jun*  
477 *and Taheri-Araghi, 2015*).

478 At fast growth, *E. coli* starts DNA replication already in the mother or grandmother, depending  
479 on the C+D period and on the generation time ( $\langle \tau_{C+D} \rangle > \langle \tau \rangle$ ). Our framework can take into account  
480 such situations for single-process models. However, for the concurrent-cycles model our theory is  
481 restricted to non-overlapping rounds of replication/segregation (that is  $\langle \tau_{C+D} \rangle < \langle \tau \rangle$ ). However, we  
482 found empirically that the theory also works for overlapping rounds within the range of  $\langle \tau_{C+D} \rangle / \langle \tau \rangle$   
483 values observed in our experiments (Figure 4 - Figure Supplement 4). For all models, analytical  
484 predictions only apply to the limit of small noise and for symmetric division. For comparison with

485 data with overlapping rounds, analysis of the role of noise, and of division asymmetry, we used  
486 direct numerical simulations of the models (see the figure supplements to Figure 4).

487 Standard linear-response formalism based on the slopes of size-growth plots.  
488 We recapitulate here the linear-response formalism used in ref. (*Micali et al., 2018a*), based on  
489 size-growth plots (see also refs. (*Amir, 2014; Grilli et al., 2018*)). This formalism assumes that a  
490 genealogy of single cells, whose cell cycles are indexed by  $i$ , grow exponentially,  $V^i(t) = V_0^i e^{\mu^i(t-t_0)}$ ,  
491 where  $V_0^i$  and  $t_0$  are the cell volume and time at birth, respectively.  $V^i(t)$  is the volume of cell cycle  $i$   
492 at time  $t$ , and  $\mu^i$  is its growth rate. During a cell cycle, the cell reaches a final size  $V_f^i$  in a period of  
493 time  $\tau^i = t_f - t_0$  (inter-division time), before dividing symmetrically,  $V_f^i = 2V_0^{i+1}$ .

Since single cells show exponential growth  $V^i(t) = V_0^i e^{\mu^i \tau^i}$ , we decided to expand the logarithmic  
growth  $G_G^i := \mu^i \tau^i$  about its average value ( $\langle G_G \rangle \simeq \log 2$ ) in terms of variations around the logarithmic  
size at birth  $q_0^i := \log V_0^i$ . In this way, the size of the newborn cells can be written as

$$2V_0^{i+1} = V_0^i e^{(G_G) - \lambda_G \delta q_0^i + \eta_0^i}, \quad (S1)$$

494 where  $\delta q_0^i = \log V_0^i - \langle \log V_0 \rangle \simeq \log V_0^i - \log \langle V_0^i \rangle$  and  $\lambda_G$  is the slope of the size-growth plot, which  
495 quantifies size homeostasis. Finally,  $\eta_0^i$  is assumed to be Gaussian noise with mean zero and  
496 standard deviation  $\sigma_{q_0}$ . This formalism is described in detail in refs. (*Amir, 2014; Grilli et al., 2018*),  
497 and amounts to treating the initial size fluctuations as a linear response problem.

By taking the logarithm of Eq. (S1), the variation in logarithmic size of the newborn cell can be  
expressed as function of the variation of the logarithmic size of the mother cell at birth,

$$\begin{aligned} q_0^{i+1} + \log 2 &= q_0^i + \langle G_G \rangle - \lambda_G \delta q_0^i + \eta_0^i \\ q_0^{i+1} + \log 2 - \langle q_0 \rangle &= q_0^i + \langle G_G \rangle - \lambda_G \delta q_0^i - \langle q_0 \rangle + \eta_0^i \\ \delta q_0^{i+1} + \log 2 &= \delta q_0^i + \langle G_G \rangle - \lambda_G \delta q_0^i + \eta_0^i \\ \delta q_0^{i+1} &= (1 - \lambda_G) \delta q_0^i + \eta_0^i. \end{aligned} \quad (S2)$$

Note that  $\lambda_G = 1$  corresponds to a sizer since the fluctuation in logarithmic initial size of cell  $i + 1$  do  
not depend on the fluctuations in logarithmic size at birth of cell  $i$  ( $\delta q_0^{i+1} = \eta_0^i$ ). On the other extreme,  
 $\lambda_G = 0$  corresponds to a timer, in which fluctuation in logarithmic size of cell  $i + 1$  fully explained by  
fluctuation in the logarithmic size of the mother cell  $i$  ( $\delta q_0^{i+1} = \delta q_0^i + \eta_0^i$ ).  $\lambda_G$  can take any intermediate  
value with  $\lambda_G = 0.5$  corresponding to an adder. Multiplying both sides of Eq. (S2) by the fluctuation  
in initial logarithmic size  $\delta q_0^i$  and taking the average gives us an expression to directly measure the  
strength of control as a linear-response from data coefficient (*Grilli et al., 2018*),

$$(1 - \lambda_G) = \frac{\langle \delta q_0^{i+1} \delta q_0^i \rangle}{\sigma_{q_0}^2}. \quad (S3)$$

The same formalism can be used to estimate the strength of size control over subperiods  
(notably, the C+D period) and between consecutive initiation events (I period) (*Micali et al., 2018a*).  
Hereafter, the quantities  $q_X^i$  refer to the logarithmic volume at cell cycle progression stage  $X$  of the  
cycle  $i$ . We consider for instance the size-growth coupling during the  $C + D$  period in the simple case  
in which initiation and termination both happen in the cell  $i$ , and we write the following expressions  
to relate size fluctuations before and after this subperiod

$$\begin{aligned} q_0^{i+1} + \log 2 &= q_B^i + \langle G_{C+D} \rangle - \lambda_{C+D} \delta q_B^i + \eta_B^i \\ q_0^{i+1} + \log 2 - \langle q_0 \rangle + \langle q_0 \rangle &= q_B^i + \langle G_{C+D} \rangle - \lambda_{C+D} \delta q_B^i - \langle q_B \rangle + \langle q_B \rangle + \eta_B^i \\ \delta q_0^{i+1} &= \delta q_B^i - \lambda_G \delta q_0^i + \langle G_{C+D} \rangle - \log 2 - \langle q_0 \rangle + \langle q_B \rangle + \eta_B^i \\ \delta q_0^{i+1} &= (1 - \lambda_{C+D}) \delta q_B^i + \eta_B^i, \end{aligned} \quad (S4)$$

where the log-size fluctuation at initiation is  $\delta q_B^i := q_B^i - \langle q_B \rangle \approx \log(V_B^i / \langle V_B \rangle)$ , with  $V_B$  size at initiation,  
and  $\eta_B^i$  Gaussian noise with mean zero and standard deviation  $\sigma_{q_B}$ . In the case in which DNA

replication starts in the mother (cycle  $i$ ) and terminates in a subsequent cell cycle (in daughters:  $n = 2$ , in granddaughters:  $n = 3$ ), Eq. (S4) becomes  $\delta q_0^{i+n} = (1 - \lambda_{C+D}) \delta q_B^i + \eta_B^i$ . In the same way, one can represent the control strength for the  $I$  and  $B$  period (*Micali et al., 2018a*) by the following expressions linking logarithmic cell size fluctuations before and after the subperiods,

$$\delta q_B^{i+1} = (1 - \lambda_I) \delta q_B^i + \eta_B^i. \quad (S5)$$

$$\delta q_B^i = (1 - \lambda_B) \delta q_0^i + \eta_0^i. \quad (S6)$$

498 From size-growth plots to adder plots.

As for  $\lambda_G$ , the control parameters  $\lambda_X$  calculated from logarithmic volumes quantify size homeostasis. For small size fluctuations, they are in 1:1 relation with the slopes of the corresponding adder plots *Grilli et al. (2017)*. Here, we translate the  $\lambda$ -formalism to the slopes of adder plots  $\zeta_X$  (*Jun and Taheri-Araghi, 2015*). Eq. (S1) can be rewritten as

$$2V_0^{i+1} = Q_G (V_0^i)^{1-\lambda_G} \langle V_0 \rangle^{\lambda_G} + v_0^i, \quad (S7)$$

where  $Q_G = e^{\langle G_G \rangle} = \exp \langle \log V_f / V_0 \rangle$ , and  $v_0^i$  is the Gaussian noise with mean zero and standard deviation  $\sigma_{V_0}$ . Eq. (S7) was first introduced in (*Amir, 2014*). Following this study, expanding around the average size, for small fluctuations (*Amir, 2014; Grilli et al., 2017, 2018*) we obtain a mapping between added size and slope of the size-growth plot,

$$\begin{aligned} 2V_0^{i+1} &= Q_G \langle V_0 \rangle + (1 - \lambda_G) Q_G \delta V_0^i + v_0^i \\ 2V_0^{i+1} - V_0^i - \langle V_0 \rangle &= Q_G \langle V_0 \rangle + [(1 - \lambda_G) Q_G - 1] \delta V_0^i - 2 \langle V_0 \rangle + v_0^i \\ \delta \Delta_G^i &= + [(1 - \lambda_G) Q_G - 1] \delta V_0^i + v_0^i. \end{aligned} \quad (S8)$$

Here  $\Delta_G^i = V_f^i - V_0^i$  is the added size during a cell cycle, and  $\delta \Delta_G^i = \Delta_G^i - \langle \Delta_G^i \rangle$  is its fluctuation. Hence, by definition, the term in square brackets must be the slope of the adder plot

$$\zeta_G := (1 - \lambda_G) Q_G - 1. \quad (S9)$$

Solving the equation for  $\lambda_G$ , we get

$$(1 - \lambda_G) = \frac{(\zeta_G + 1)}{Q_G}, \quad (S10)$$

499 which can be used (assuming small fluctuations (*Grilli et al., 2017*)) to convert the slope  $\zeta_G$  of the  
500 adder plot into the slope of the size-growth plot  $\lambda_G$ , and vice-versa.

It is straightforward to extend the relationship to cell-cycle subperiods and to the inter-initiation period, leading to the following relationships

$$\zeta_{C+D} := (1 - \lambda_{C+D}) Q_{C+D} - 1 \quad (S11)$$

$$\zeta_B := (1 - \lambda_B) Q_B - 1 \quad (S12)$$

$$\zeta_I := (1 - \lambda_I) Q_I - 1, \quad (S13)$$

501 where  $Q_{C+D} = \exp \langle \log 2^n V_0 / V_B \rangle$ ,  $Q_B = \exp \langle \log V_B / (n V_0) \rangle$ ,  $Q_I = \exp \langle \log n V_B^{i+1} / V_B^i \rangle$  and  $n = \lfloor \tau_{C+D} / \tau \rfloor +$   
502 1.

503 It is important to notice that for inter-division and inter-initiation events in symmetrically dividing  
504 cells  $Q_{G,I} \simeq 2$ . For these subperiods, adder behavior is equivalent to  $\zeta_{G,I} = 0$ . However, the same  
505 equivalence does not hold for other subperiods, and in particular of the  $B$  and  $C + D$  period, of  
506 interest here, since  $Q_{B,C+D} \neq 2$ .

## 507 Adder coupling constants for single-process ICD models

508 We call here "ICD" models all single-process models that assume a cell-size-independent mechanism  
 509 in control of the inter-initiation process (I period) and a mechanism that couples cell division to the  
 510 size of DNA replication initiation (C+D period). We already generalized the approach of refs. (**Ho**  
 511 **and Amir, 2015; Witz et al., 2019**) to arbitrary coupling constants for the  $C + D$  period (**Micali et al.,**  
 512 **2018a**). In this class of models, DNA replication is the limiting process setting subsequent division  
 513 and initiation events. This section presents the generalised relationships for ICD models in the  
 514 formalism of adder coupling constants, for non-overlapping and overlapping replication rounds,  
 515 used in Figure 4 of the main text and its supplements.

From Eq. (S8) and the equivalent equations for  $C + D$ ,  $B$  and  $I$ , we can derive the following relationships

$$\delta V_0^{i+1} = \frac{(1 - \lambda_G) Q_G}{2} \delta V_0^i + v_0^i = \frac{(\zeta_G + 1)}{2} \delta V_0^i + v_0^i \quad (S14)$$

$$\delta V_B^{i+1} = \frac{(1 - \lambda_I) Q_I}{2} \delta V_B^i + v_B^i = \frac{(\zeta_I + 1)}{2} \delta V_B^i + v_B^i \quad (S15)$$

$$\delta V_B^i = (1 - \lambda_B) Q_B \delta V_0^i + v_0^i = (\zeta_B + 1) \delta V_0^i + v_0^i \quad (S16)$$

$$\delta V_0^{i+n} = \frac{(1 - \lambda_{C+D}) Q_{C+D}}{2n} \delta V_B^i + v_B^i = \frac{(\zeta_{C+D} + 1)}{2n} \delta V_B^i + v_B^i, \quad (S17)$$

516 where  $i + n$  generalises to the case in which the size at birth of cell  $i + n$  by replication initiation in  
 517 cell  $i$ .

In ICD models, the coupling constants  $\zeta_I$  and  $\zeta_{C+D}$  are treated as input control parameters, while  $\zeta_G$  and  $\zeta_B$  are outcomes of the model, measured as observable correlations. The predicted correlations for ICD models are (see ref. (**Micali et al., 2018a**)),

$$\begin{cases} (\zeta_G + 1) = \frac{1}{(2n)^2} (\zeta_{C+D} + 1)^2 (\zeta_I + 1) \frac{\sigma_{V_B}^2}{\sigma_{V_0}^2} \\ (\zeta_B + 1) = \frac{1}{2^{(n+1)n}} (\zeta_{C+D} + 1) (\zeta_I + 1)^n \frac{\sigma_{V_B}^2}{\sigma_{V_0}^2} \end{cases} \quad (S18)$$

The model by Witz and coworkers presented in ref. (**Witz et al., 2019**) falls in this broad category, with the assumption that  $\zeta_{I,C+D} = 0$ , i.e. the coupling constants impose perfect adders both between initiation events and during the C+D period. The predicted correlation patterns for this model are

$$\begin{cases} (\zeta_G + 1) = \frac{1}{(2n)^2} \frac{\sigma_{V_B}^2}{\sigma_{V_0}^2} \\ (\zeta_B + 1) = \frac{1}{2^{(n+1)n}} \frac{\sigma_{V_B}^2}{\sigma_{V_0}^2}. \end{cases} \quad (S19)$$

518 Note that although the model presented in ref. (**Witz et al., 2019**) falls in the broad category of  
 519 ICD models, the authors of this study extend the model with an additional parameter, accounting for  
 520 asymmetric division. This additional ingredient allows their theory to deviate from the predictions  
 521 of Eq. (S19). Fig 4 - Figure Supplement 2 illustrates this point. As discussed in the main text,  
 522 asymmetric division can drive  $\zeta_G$  towards adder behavior. However, in our hands this requires  
 523 unrealistically high values of asymmetry. Furthermore, this model fails to reproduce the results of  
 524 the A22 perturbation presented in this work, since the specific  $C + D$  control pattern is postulated  
 525 in the model, while it changes with the perturbation in the experiments (Fig 4C in the main text).

## 526 Concurrent cycles

527 This section presents the predicted correlation patterns for the concurrent cycles framework in  
 528 terms of adder coupling constants. In this model (**Micali et al., 2018a**) two cycles are in competition  
 529 for setting cell division. According to the size-growth framework, a cycle ' $H$ ' starts from cell division,  
 530 and has control strength  $\lambda_H$  over the next division event. In addition, a cycle ' $C + D$ ' starts from  
 531 initiation of DNA replication and has control strength  $\lambda_{C+D}$  over the the division event following



532 termination of DNA replication and segregation. At the single cell level, the slowest process set  
533 division, and the parameter  $p_H$  encodes the average probability of the cycle  $H$  to set division.

534 In the concurrent cycles model the control strength of the inter-division process ( $H$ ), of the  
535 inter-initiation process ( $I$ ), and of the replication-segregation processes set by initiation ( $C + D'$ ) are  
536 inputs of the model. Following ref. (Micali et al., 2018a), the latter is assumed to be a pure timer,  
537 i.e.  $\lambda_{C+D'} = 0$ . In contrast, the slopes resulting from the competition of the two concurrent cycles, i.e  
538 the inter-division ( $G$ ) slope and the slopes over the  $C + D$  period are outcomes of the model, that is,  
539 predictions that can be validated using experimental data.

Following a similar approach to ref. Micali et al. (2018a) and using Eqs. S14-S17, we obtain

$$\begin{aligned}\langle \delta V_0^{i+1} \delta V_0^i \rangle &= \frac{(\zeta_G + 1)}{2} \sigma_{V_0}^2 = p_H \frac{(\zeta_H + 1)}{2} \sigma_{V_0}^2 + (1 - p_H) \frac{Q_{C+D'}}{2} (\zeta_B + 1) \sigma_{V_0}^2, \\ \langle \delta V_B^i \delta V_0^i \rangle &= (\zeta_B + 1) \sigma_{V_0}^2 = \frac{(\zeta_{C+D} + 1) (\zeta_I + 1)}{2} \sigma_{V_B}^2, \\ \langle \delta V_0^{i+1} \delta V_B^i \rangle &= \frac{(\zeta_{C+D} + 1)}{2} \sigma_{V_B}^2 = p_H \frac{(\zeta_H + 1)}{2} (\zeta_B + 1) \sigma_{V_0}^2 + (1 - p_H) \frac{Q_{C+D'}}{2} \sigma_{V_B}^2,\end{aligned}$$

540 where the effective parameter  $p_H$  quantifies the probability that the inter-division process is limiting,  
541 and is a function of basic parameters that are fixed in a given condition, such as mean size at  
542 initiation and noises (see ref. (Micali et al., 2018a)).

The above equations can be recast into the following relationships involving adder coupling constants:

$$\begin{cases} (\zeta_G + 1) = p_H (\zeta_H + 1) + (1 - p_H) Q_{C+D'} (\zeta_B + 1) \\ (\zeta_B + 1) = (\zeta_{C+D} + 1) (\zeta_I + 1) \frac{\sigma_{V_B}^2}{4\sigma_{V_0}^2} \\ (\zeta_{C+D} + 1) = \frac{(1-p_H)Q_{C+D'}}{(1-p_H)\frac{(\zeta_H+1)(\zeta_I+1)}{4}} \end{cases} \quad (S20)$$

Finally, for the specific case of the adder-adder model in which both the inter-initiation and the  $H$  processes are adders ( $\zeta_I = 0$  and  $\zeta_H = 0$ ), the same relationships simplify into the following scheme,

$$\begin{cases} (\zeta_G + 1) = p_H + (1 - p_H) Q_{C+D'} (\zeta_B + 1) \\ (\zeta_B + 1) = \frac{(1-p_H)}{(1-\frac{p_H}{4})} \frac{Q_{C+D}\sigma_{V_B}^2}{4\sigma_{V_0}^2} \\ (\zeta_{C+D} + 1) = \frac{(1-p_H)Q_{C+D'}}{(1-\frac{p_H}{4})} \end{cases} \quad (S21)$$

543 Note that Eqs. (S20)-(S21) are valid for  $n = 1$ , i.e. for initiation and termination that happen in the  
544 same cell cycle. As discussed in ref. (Micali et al., 2018a)) simulations are used to extend the results  
545 to  $n > 1$ .

546 The latter model involving adders over  $I$  and  $H$  is used for the comparison in Figure 4 of the  
547 main text, while a more general model fixing  $\zeta_I = 0$  but allowing  $\zeta_H$  to vary is used for the fit in  
548 Figure 4 - Figure Supplement 1. Note that in the above expressions  $Q_{C+D'}$  is the growth during  
549 the  $C + D'$  period and is not measurable directly. To bypass this problem, we approximate it by  
550  $Q_{C+D'} = 1.8$ , which is the average measured  $Q_{C+D}$  in unperturbed conditions.  $Q_{C+D'}$  is equal to  $Q_{C+D}$   
551 for  $p_H = 0$ . In unperturbed conditions, where  $p_H \approx 0.5$ ,  $Q_{C+D'} \lesssim Q_{C+D}$ , and the two values are similar,  
552 since they differ only by the low-CV noise of the inter-division process. For the A22 perturbations,  
553 we assumed that the value of  $Q_{C+D'}$  remains constant, as the  $C + D'$  period should be unperturbed  
554 by A22 increasing concentrations (as supported by Fig. 2C, since the measurable  $C$  period is on  
555 average constant). We also note that this approximation is equivalent to the reasonable assumption  
556 that  $Q_H \approx 2$  used in ref. (Micali et al., 2018a).

## 557 Brief description of simulations

558 In this manuscript we used stochastic simulations for two reasons: (i) to explore the role of  
559 asymmetric division in ICD models (Figure 4 - Figure Supplement 2), as suggested by *Witz et al.*  
560 (2019), (ii) to validate the analytical predictions for  $\zeta_G$  and  $\zeta_{CD}$  for the concurrent cycles model and in  
561 particular the robustness of the small noise approximation and to quantitative extend concurrent  
562 cycle predictions for  $\langle \tau_{C+D} \rangle / \langle \tau \rangle > 1$  (Figure 4 - Figure Supplement 4).

563 For simulations in Figure 4 - Figure Supplement 2 that account for asymmetric division, we were  
564 inspired by the model in ref. (*Witz et al., 2019*). Briefly, for each initiation event  $V_B^i$ , the number of  
565 origins  $n_{\text{oris}}$  is duplicated and two random added lengths are chosen from log-normal distributions  
566 for the I-period ( $\Delta_I^i$ ) and the C+D-period ( $\Delta_{CD}^i$ ), respectively. Note that both means ( $\langle \Delta_I \rangle$  and  $\langle \Delta_{CD} \rangle$ )  
567 and standard deviation ( $\sigma_I$  and  $\sigma_{CD}$ ) of the distributions are parameters inferred from data.  $\Delta_{CD}^i$  sets  
568 the division event:  $V_d^i = V_B^i + \Delta_{CD}^i$ , if  $n_{\text{oris}} = 1$ ;  $V_d^{i+1} = \frac{V_B^i}{2} + \Delta_{CD}^i - \left( \frac{V_d^i}{2} - V_0^{i+1} \right)$ , if  $n_{\text{oris}} = 2$ . Events with  
569  $n_{\text{oris}} > 2$  are rare in the conditions used in Figure 4 - Figure Supplement 2. However, the simulations  
570 can account for those events correcting for asymmetries in the multiple divisions and ensuring  
571 an added size between  $V_B^i/2^{n_{\text{oris}}-1}$  and the triggered division event equal to  $\Delta_{CD}^i$ . The number or  
572 origins is divided by 2 at each division event. To account of asymmetric division, the newborn  
573 cell has volume  $V_0^{i+1}$  set by a Gaussian random variable with mean  $V_d^i/2$  and standard deviation  
574  $\alpha V_d^i/2$ . Typical values of  $\alpha$  from our experimental data are 0.05 (see Figure 4 - Figure Supplement 2).  
575 The next initiation event is set by  $\Delta_I^i$ :  $V_B^{i+1} = V_B^i + \Delta_I^i$  if the next initiation event is in the same cell  
576 cycles,  $V_B^{i+1} = \frac{V_B^i}{2} + n_{\text{oris}} \Delta_I^i - \left( \frac{V_d^i}{2} - V_0^{i+1} \right)$  if the next initiation event is in the following cell cycle. More  
577 complicated scenarios in which the next initiation event is in further cell cycles accounts for the  
578 multiple asymmetric division events and calculate the actual added size. In the conditions used in  
579 Figure 4 - Figure Supplement 2 these events are rare.

580 For simulations in Figure 4 - Figure Supplement 4 of the concurrent-cycles model with perfectly  
581 symmetric division, we refer the reader to ref. (*Micali et al., 2018b,a*).

## 582 Description of the analysis of data from the literature

583 To compare our findings with data available in the literature, we downloaded data of untreated  
584 conditions from *Si et al. (2019)* (downloaded at <https://www.sciencedirect.com/science/article/pii/S0960982219304919>) and *Witz et al. (2019)* (downloaded at <https://zenodo.org/record/3149097#.X7PKA9NKhBx>). Excel files are imported in MATLAB using the function *readtable* and all the subse-  
586 quent analysis has been performed with MATLAB. Since this manuscript is focused on slow-growth  
587 conditions, we restrict our comparison with (*Si et al., 2019*) to their slow-growth conditions (*MG1655*  
588 *acetate* and *NCM3722 MOPS arginine*) (see Figure 4 - Figure Supplement 3).

590 Note that *Si et al. (2019)* report the initiation size per origin without specifying the number of  
591 origins and without providing the added size during C+D. For this reason, we assume the number of  
592 origins by plotting the size at initiation vs the size of newborn cells. Cells in which the initiation per  
593 origins is smaller than the size at birth are considered to terminate DNA replication in the daughter  
594 cell. In this case, the added size during C+D is estimated from ( *division size (micron) - initiation size*  
595 *per ori (micron) ) / 2 + division size (micron) daughter - newborn size (micron) daughter*. Cells in which  
596 the initiation per origins is larger than the size at birth are considered to terminate DNA replication  
597 in the same cycle as initiation started. Hence, the added size during C+D is *division size (micron) -*  
598 *initiation size per ori (micron)*. The added size between division events is estimated from *division size*  
599 *(micron) - newborn size (micron)*. The added size during two consecutive initiation events is estimated  
600 from ( *division size (micron)-initiation size per ori (micron) ) / 2 +initiation size per ori (micron) daughter -*  
601 *newborn size (micron) daughter*. The slopes  $\zeta_G$ ,  $\zeta_I$  and  $\zeta_{CD}$  were calculated by applying the *robustfit*  
602 function in MATLAB to the clouds of points of the inter division, inter initiation and C+D adder plots,  
603 respectively.

604 The data from *Witz et al. (2019)* are in a different format which provides the inter-division,  
605 inter-initiation and *C + D* added size as well as size at birth and size at initiation. For this reason,

606 we were able to calculate the  $\zeta_G$ ,  $\zeta_I$ , and  $\zeta_{CD}$  directly using the added quantities and the *robustfit*  
607 function in MATLAB.

## 608 Acknowledgements

609 We thank the Biomaterials and Microfluidics core facility of Institut Pasteur, and particularly Samy  
610 Gobaa, for the help in the fabrication of microfluidic chips, former student Ewen Corre for first  
611 investigations of DnaN-Ypet behavior, members of the Microbial Morphogenesis and Growth lab  
612 for discussion and technical assistance, Rodrigo Reyes-Lamothe for advice and for sharing the  
613 DnaN-Ypet-containing strain. We also thank Pietro Cicuta and Mia Panlilio for sharing microfluidic  
614 devices and advice about microfluidic protocols. This work was supported by grants to SVT from  
615 the European Research Council (ERC) under the Europe Union's Horizon 2020 research and innova-  
616 tion program [Grant Agreement No. (679980)], the French Government's Investissement d'Avenir  
617 program Laboratoire d'Excellence "Integrative Biology of Emerging Infectious Diseases" (ANR-10-  
618 LABX-62-IBEID), the Mairie de Paris "Emergence(s)" program, and the Volkswagen Foundation. MCL  
619 was funded by the Italian Association for Cancer Research AIRC-IG (REF: 23258). GM was supported  
620 by grant Nr. 310030\_188642 from the Swiss National Science Foundation to Martin Ackermann.

## 621 References

- 622 **Adicptaningrum A**, Osella M, Moolman MC, Cosentino Lagomarsino M, Tans SJ. Stochasticity and homeostasis  
623 in the E. coli replication and division cycle. *Scientific Reports*. 2015; 5(1):18261. [http://www.nature.com/  
624 articles/srep18261](http://www.nature.com/articles/srep18261), doi: 10.1038/srep18261.
- 625 **Amir A**. Cell size regulation in bacteria. *Physical Review Letters*. 2014; 112(20):1–5. doi: [10.1103/Phys-  
626 RevLett.112.208102](https://doi.org/10.1103/PhysRevLett.112.208102).
- 627 **Bean G**, Flickinger S, Westler W, McCully M, Sept D, Weibel D, Amann K. A22 disrupts the bacterial actin  
628 cytoskeleton by directly binding and inducing a low-affinity state in MreB. *Biochemistry*. 2009; 48(22):4852–  
629 4857.
- 630 **Brown SD**, Jun S. Complete genome sequence of Escherichia coli NCM3722. *Genome Announcements*. 2015;  
631 3(4):3722. doi: [10.1128/genomeA.00879-15](https://doi.org/10.1128/genomeA.00879-15).
- 632 **Cadart C**, Venkova L, Recho P, Lagomarsino MC, Piel M. The physics of cell-size regulation across timescales.  
633 *Nature Physics*. 2019; <http://www.nature.com/articles/s41567-019-0629-y>, doi: 10.1038/s41567-019-0629-y.
- 634 **Campos M**, Surovtsev IV, Kato S, Paintdakhi A, Beltran B, Ebmeier SE, Jacobs-Wagner C. A constant size extension  
635 drives bacterial cell size homeostasis. *Cell*. 2014; 159(6):1433–1446. [http://dx.doi.org/10.1016/j.cell.2014.11.  
636 022](http://dx.doi.org/10.1016/j.cell.2014.11.022), doi: [10.1016/j.cell.2014.11.022](https://doi.org/10.1016/j.cell.2014.11.022).
- 637 **Chandler-Brown D**, Schmoller KM, Winetraub Y, Skotheim JM. The Adder Phenomenon Emerges from In-  
638 dependent Control of Pre- and Post-Start Phases of the Budding Yeast Cell Cycle. *Current Biology*. 2017;  
639 27(18):2774–2783.e3. <http://dx.doi.org/10.1016/j.cub.2017.08.015>, doi: [10.1016/j.cub.2017.08.015](https://doi.org/10.1016/j.cub.2017.08.015).
- 640 **Dewachter L**, Verstraeten N, Fauvart M, Michiels J. An integrative view of cell cycle control in Escherichia coli.  
641 *FEMS Microbiology Reviews*. 2018; 42(2):116–136.
- 642 **Ghusinga KR**, Vargas-Garcia CA, Singh A. A mechanistic stochastic framework for regulating bacterial cell division.  
643 *Scientific Reports*. 2016; 6(1):30229. <http://www.nature.com/articles/srep30229>, doi: 10.1038/srep30229.
- 644 **Grilli J**, Cadart C, Micali G, Osella M, Cosentino Lagomarsino M. The Empirical Fluctuation Pattern of E. coli  
645 Division Control. *Frontiers in Microbiology*. 2018; 9(July):1–10. [https://www.frontiersin.org/article/10.3389/  
646 fmicb.2018.01541/full](https://www.frontiersin.org/article/10.3389/fmicb.2018.01541/full), doi: [10.3389/fmicb.2018.01541](https://doi.org/10.3389/fmicb.2018.01541).

- 647 **Grilli J**, Osella M, Kennard AS, Lagomarsino MC. Relevant parameters in models of cell division control. *Physical*  
648 *Review E*. 2017; 95(3):1–14. doi: [10.1103/PhysRevE.95.032411](https://doi.org/10.1103/PhysRevE.95.032411).
- 649 **Harris LK**, Theriot JA. Relative rates of surface and volume synthesis set bacterial cell size. *Cell*. 2016; 165(6):1479–  
650 1492. <http://dx.doi.org/10.1016/j.cell.2016.05.045>, doi: [10.1016/j.cell.2016.05.045](https://doi.org/10.1016/j.cell.2016.05.045).
- 651 **Harris LK**, Theriot JA. Surface Area to Volume Ratio: A Natural Variable for Bacterial Morphogenesis. *Trends in*  
652 *Microbiology*. 2018; 26(10):815–832. <https://doi.org/10.1016/j.tim.2018.04.008>, doi: [10.1016/j.tim.2018.04.008](https://doi.org/10.1016/j.tim.2018.04.008).
- 653 **Ho PY**, Amir A. Simultaneous regulation of cell size and chromosome replication in bacteria. *Frontiers in*  
654 *Microbiology*. 2015; 6(JUL):1–10. doi: [10.3389/fmicb.2015.00662](https://doi.org/10.3389/fmicb.2015.00662).
- 655 **Jun S**, Taheri-Araghi S. Cell-size maintenance: Universal strategy revealed. *Trends in Microbiology*. 2015;  
656 23(1):4–6. <http://dx.doi.org/10.1016/j.tim.2014.12.001>, doi: [10.1016/j.tim.2014.12.001](https://doi.org/10.1016/j.tim.2014.12.001).
- 657 **Kennard AS**, Osella M, Javer A, Grilli J, Nghe P, Tans SJ, Cicuta P, Cosentino Lagomarsino M. Individuality and  
658 universality in the growth-division laws of single *E. Coli* cells. *Physical Review E*. 2016; 93(1):1–18. doi:  
659 [10.1103/PhysRevE.93.012408](https://doi.org/10.1103/PhysRevE.93.012408).
- 660 **Kleckner NE**, Chatzi K, White MA, Fisher JK, Stouf M. Coordination of growth, chromosome repli-  
661 cation/segregation, and cell division in *E. coli*. *Frontiers in Microbiology*. 2018; 9(JUL):1–12. doi:  
662 [10.3389/fmicb.2018.01469](https://doi.org/10.3389/fmicb.2018.01469).
- 663 **Long Z**, Nugent E, Javer A, Cicuta P, Sclavi B, Cosentino Lagomarsino M, Dorfman KD. Microfluidic chemostat  
664 for measuring single cell dynamics in bacteria. *Lab on a Chip*. 2013; 13(5):947. [http://xlink.rsc.org/?DOI=](http://xlink.rsc.org/?DOI=c2lc41196b)  
665 [c2lc41196b](https://doi.org/10.1039/c2lc41196b), doi: [10.1039/c2lc41196b](https://doi.org/10.1039/c2lc41196b).
- 666 **Long Z**, Olliver A, Brambilla E, Sclavi B, Lagomarsino MC, Dorfman KD. Measuring bacterial adaptation dynamics  
667 at the single-cell level using a microfluidic chemostat and time-lapse fluorescence microscopy. *The Analyst*.  
668 2014; 139(20):5254–5262. <http://xlink.rsc.org/?DOI=C4AN00877D>, doi: [10.1039/C4AN00877D](https://doi.org/10.1039/C4AN00877D).
- 669 **Männik J**, Walker BE, Männik J. Cell cycle-dependent regulation of FtsZ in *Escherichia coli* in slow growth  
670 conditions. *Molecular Microbiology*. 2018; 110(6):1030–1044. doi: [10.1111/mmi.14135](https://doi.org/10.1111/mmi.14135).
- 671 **Micali G**, Grilli J, Marchi J, Osella M, Lagomarsino MC. Dissecting the control mechanisms for DNA replication  
672 and cell division in *E. coli*. *Cell Reports*. 2018; 25(3):761–771. <https://doi.org/10.1016/j.celrep.2018.09.061>,  
673 doi: [10.1016/j.celrep.2018.09.061](https://doi.org/10.1016/j.celrep.2018.09.061).
- 674 **Micali G**, Grilli J, Osella M, Lagomarsino MC. Concurrent processes set *E. coli* cell division. *Science Advances*.  
675 2018; 4(November):1–7. doi: [10.1101/301671](https://doi.org/10.1101/301671).
- 676 **Michelsen O**, Teixeira de Mattos MJ, Jensen PR, Hansen FG. Precise determinations of C and D periods by flow  
677 cytometry in *Escherichia coli* K-12 and B/r. *Microbiology*. 2003; 149(4):1001–1010. doi: [10.1099/mic.0.26058-0](https://doi.org/10.1099/mic.0.26058-0).
- 678 **Miller JH**. *Experiments in Molecular Genetics*. Cold Spring Harbor Laboratory; 1972.
- 679 **Moolman MC**, Krishnan ST, Kerssemakers JW, van den Berg A, Tulinski P, Depken M, Reyes-Lamothe R, Sherratt  
680 DJ, Dekker NH. Slow unloading leads to DNA-bound beta2-sliding clamp accumulation in live *Escherichia*  
681 *coli* cells. *Nature Communications*. 2014; 5:5820. <http://www.ncbi.nlm.nih.gov/pubmed/25520215>, doi:  
682 [10.1038/ncomms6820](https://doi.org/10.1038/ncomms6820).
- 683 **Ojkc N**, Serbanescu D, Banerjee S. Surface-to-volume scaling and aspect ratio preservation in rod-shaped  
684 bacteria. *eLife*. 2019; 8:1–11. doi: [10.7554/eLife.47033](https://doi.org/10.7554/eLife.47033).
- 685 **Oldewurtel ER**, Kitahara Y, Cordier B, Özbaykal G, van Teeffelen S. Bacteria control cell volume by coupling  
686 cell-surface expansion to dry-mass growth. *bioRxiv*. 2019; p. 769786. [https://www.biorxiv.org/content/10.](https://www.biorxiv.org/content/10.1101/769786v1.full)  
687 [1101/769786v1.full](https://doi.org/10.1101/769786), doi: [10.1101/769786](https://doi.org/10.1101/769786).

- 688 **Osella M**, Tans SJ, Cosentino Lagomarsino M. Step by Step, Cell by Cell: Quantification of the Bacterial  
689 Cell Cycle. *Trends in Microbiology*. 2017; 25(4):250–256. <http://dx.doi.org/10.1016/j.tim.2016.12.005>, doi:  
690 [10.1016/j.tim.2016.12.005](https://doi.org/10.1016/j.tim.2016.12.005).
- 691 **Paintdakhi A**, Parry B, Campos M, Irnov I, Elf J, Surovtsev I, Jacobs-Wagner C. Oufiti: An integrated software  
692 package for high-accuracy, high-throughput quantitative microscopy analysis. *Molecular Microbiology*. 2016;  
693 99(4):767–777. doi: [10.1111/mmi.13264](https://doi.org/10.1111/mmi.13264).
- 694 **Panlilio M**, Grilli J, Tallarico G, Sclavi B, Cicuta P, Lagomarsino MC. Threshold accumulation of a constitutive  
695 protein explains E. coli cell division behavior in nutrient upshifts. *bioRxiv*. 2020; [https://www.biorxiv.org/](https://www.biorxiv.org/content/early/2020/08/03/2020.08.03.233908)  
696 [content/early/2020/08/03/2020.08.03.233908](https://www.biorxiv.org/content/early/2020/08/03/2020.08.03.233908), doi: [10.1101/2020.08.03.233908](https://doi.org/10.1101/2020.08.03.233908).
- 697 **Reyes-Lamothe R**, Sherratt D, Leake M. Stoichiometry and architecture of active DNA replication machinery in  
698 *Escherichia coli*. *Science*. 2010; 328:498–501. doi: [10.1016/j.bpj.2009.12.3312](https://doi.org/10.1016/j.bpj.2009.12.3312).
- 699 **Saint-Pierre F**, Cui L, Priest DG, Endy D, Dodd IB, Shearwin KE. One-Step Cloning and Chromosomal Integration  
700 of DNA. *ACS synthetic Biology*. 2013; 2:537–541. doi: [10.1021/sb400021j](https://doi.org/10.1021/sb400021j).
- 701 **Schaechter M**, Maaløe O, Kjeldgaard NO. Dependency on medium and temperature of cell size and chemical  
702 composition during balanced growth of *Salmonella typhimurium*. *Microbiology*. 1958; 19(3):592–606.
- 703 **Serbanescu D**, Ojkic N, Banerjee S. Nutrient-dependent trade-offs between ribosomes and division protein  
704 synthesis control bacterial cell size and growth. *Cell Reports*. 2020; 32(12):108183.
- 705 **Si F**, Li D, Cox SE, Sauls JT, Azizi O, Sou C, Schwartz AB, Erickstad MJ, Jun Y, Li X, Jun S. Invariance of Initia-  
706 tion Mass and Predictability of Cell Size in *Escherichia coli*. *Current Biology*. 2017; 27(9):1278–1287. doi:  
707 [10.1016/j.cub.2017.03.022](https://doi.org/10.1016/j.cub.2017.03.022).
- 708 **Si F**, Treut GL, Sauls JT, Vadia S, Levin PA, Jun S. Mechanistic origin of cell-size control and homeostasis in  
709 bacteria. *Current Biology*. 2019; p. 478818. <https://www.biorxiv.org/content/10.1101/478818v2.full>, doi:  
710 [10.1101/478818](https://doi.org/10.1101/478818).
- 711 **Sompayrac L**, Maaloe O. Autorepressor model for control of DNA replication. *Nature*. 1973; 244:47–49.
- 712 **Soupeine E**, Heeswijk WCV, Stewart V, Bertenthal D, Lee H, Prasad G, Paliy O, Charernnoppakul P, Kustu S,  
713 Plumbridge J. Physiological Studies of *Escherichia coli* Strain MG1655 : Growth Defects and Apparent Cross-  
714 Regulation of Gene Expression. *Journal of Bacteriology*. 2003; 185(18):5611–5626. doi: [10.1128/JB.185.18.5611](https://doi.org/10.1128/JB.185.18.5611).
- 715 **Taheri-Araghi S**, Bradde S, Sauls JT, Hill NS, Levin PA, Paulsson J, Vergassola M, Jun S. Cell-size control and  
716 homeostasis in bacteria. *Current Biology*. 2015; 25(3):385–391. <http://dx.doi.org/10.1016/j.cub.2014.12.009>,  
717 doi: [10.1016/j.cub.2014.12.009](https://doi.org/10.1016/j.cub.2014.12.009).
- 718 **Tropini C**, Lee TK, Hsin J, Desmarais SM, Ursell T, Monds RD, Huang KC. Principles of Bacterial Cell-Size  
719 Determination Revealed by Cell-Wall Synthesis Perturbations. *Cell Reports*. 2014; 9(4):1520–1527. <http://dx.doi.org/10.1016/j.celrep.2014.10.027>, doi: [10.1016/j.celrep.2014.10.027](https://doi.org/10.1016/j.celrep.2014.10.027).
- 720
- 721 **Turner JJ**, Ewald JC, Skotheim JM. Cell size control in yeast. *Current biology*. 2012; 22(9):R350–R359.
- 722 **Vigouroux A**, Oldewurtel E, Cui L, Bikard D, van Teeffelen S. Tuning dCas9's ability to block transcription  
723 enables robust, noiseless knockdown of bacterial genes. *Molecular Systems Biology*. 2018; 14(3):e7899.  
724 <http://msb.embopress.org/lookup/doi/10.15252/msb.20177899>, doi: [10.15252/msb.20177899](https://doi.org/10.15252/msb.20177899).
- 725 **Wallden M**, Fange D, Lundius EG, Baltekin Ö, Elf J. The Synchronization of Replication and Division Cycles in  
726 Individual *E. coli* Cells. *Cell*. 2016; 166(3):729–739. doi: [10.1016/j.cell.2016.06.052](https://doi.org/10.1016/j.cell.2016.06.052).
- 727 **Wang P**, Robert L, Pelletier J, Dang WL, Taddei F, Wright A, Jun S. Robust growth of *Escherichia coli*. *Current*  
728 *Biology*. 2010; 20(12):1099–1103. <http://dx.doi.org/10.1016/j.cub.2010.04.045>, doi: [10.1016/j.cub.2010.04.045](https://doi.org/10.1016/j.cub.2010.04.045).

- 729 **Wehrens M**, Ershov D, Rozendaal R, Walker N, Schultz D, Kishony R, Levin PA, Tans SJ. Size Laws and Division  
730 Ring Dynamics in Filamentous Escherichia coli cells. *Current Biology*. 2018; 28(6):972–979.e5. [https://doi.org/](https://doi.org/10.1016/j.cub.2018.02.006)  
731 [10.1016/j.cub.2018.02.006](https://doi.org/10.1016/j.cub.2018.02.006), doi: [10.1016/j.cub.2018.02.006](https://doi.org/10.1016/j.cub.2018.02.006).
- 732 **Witz G**, Julou T, van Nimwegen E. Response to comment on 'Initiation of chromosome replication controls both  
733 division and replication cycles in E. coli through a double-adder mechanism'. *bioRxiv*. 2020; .
- 734 **Witz G**, van Nimwegen E, Julou T. Initiation of chromosome replication controls both division and replication  
735 cycles in E. coli through a double-adder mechanism. *eLife*. 2019; p. 593590. [https://www.biorxiv.org/content/](https://www.biorxiv.org/content/10.1101/593590v3.full)  
736 [10.1101/593590v3.full](https://www.biorxiv.org/content/10.1101/593590v3.full), doi: [10.1101/593590](https://doi.org/10.1101/593590).
- 737 **Young JW**, Locke JCW, Altinok A, Rosenfeld N, Bacarian T, Swain PS, Mjolsness E, Elowitz MB. Measuring single-cell  
738 gene expression dynamics in bacteria using fluorescence time-lapse microscopy. *Nature protocols*. 2012 jan;  
739 7(1):80–8. <http://www.ncbi.nlm.nih.gov/pubmed/22179594>, doi: [10.1038/nprot.2011.432](https://doi.org/10.1038/nprot.2011.432).
- 740 **Zheng H**, Bai Y, Jiang M, Tokuyasu TA, Huang X, Zhong F, Wu Y, Fu X, Kleckner N, Hwa T, Liu C. General  
741 quantitative relations linking cell growth and the cell cycle in Escherichia coli. *Nature Microbiology*. 2020;  
742 <http://dx.doi.org/10.1038/s41564-020-0717-x>, doi: [10.1038/s41564-020-0717-x](https://doi.org/10.1038/s41564-020-0717-x).
- 743 **Zheng H**, Ho PY, Jiang M, Tang B, Liu W, Li D, Yu X, Kleckner NE, Amir A, Liu C. Interrogating the Escherichia  
744 coli cell cycle by cell dimension perturbations. *Proc Nat Acad Sci USA*. 2016; 113(52):15000–15005. [http:](http://www.pnas.org/lookup/doi/10.1073/pnas.1617932114)  
745 [://www.pnas.org/lookup/doi/10.1073/pnas.1617932114](http://www.pnas.org/lookup/doi/10.1073/pnas.1617932114), doi: [10.1073/pnas.1617932114](https://doi.org/10.1073/pnas.1617932114).

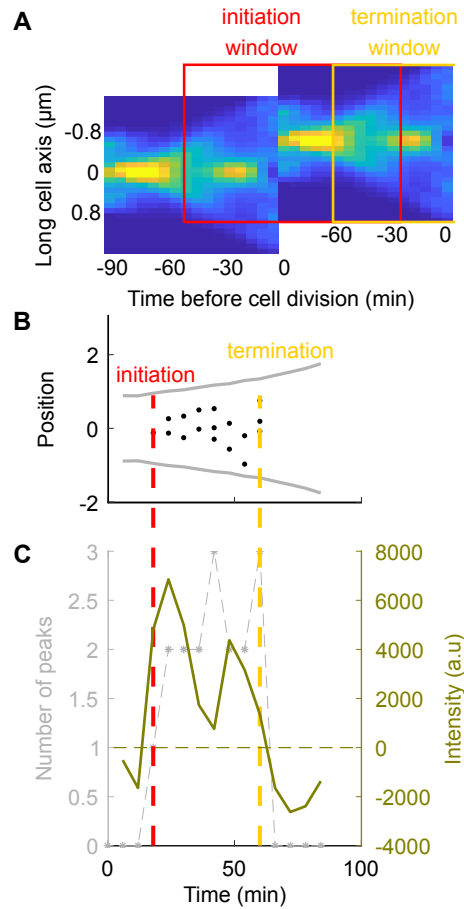

**Figure 2 - Figure Supplement 1. Detection of DNA replication in a single cell using the YPet-DnaN fusion.**

**A:** Conditional probability density of the occurrence of YPet-DnaN foci as a function of cell length ( $y$ -axis)  $p(y|t)dy$  as a function of time before subsequent cell division ( $x$ -axis) for untreated cells. Red and yellow squares represent the windows in which we are looking for initiation and termination respectively. **B, C:** The DNA replication cycle can be detected based on the number of spots detected inside the cell, or, as chosen for this paper, based on the intensity distribution of the YPet-DnaN signal (see Materials and Methods for details).

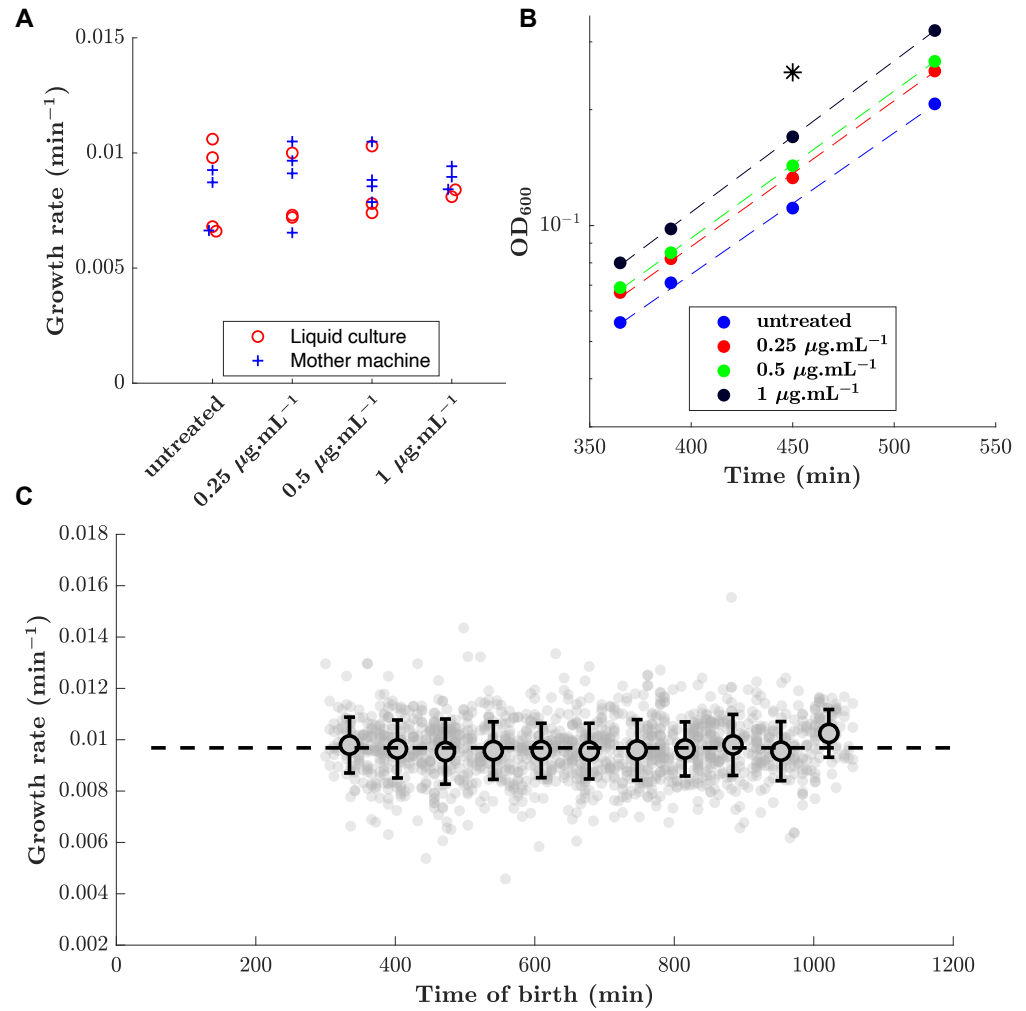

**Figure 2 - Figure Supplement 2. Growth rate is maintained over time and upon A22 treatment.**

**A:** Effect of A22 treatment on growth rate measured in liquid culture and in mother machine. **B:** Example of growth curves obtained in liquid culture. The star indicates the time at which the snapshots (Figure 2A) were taken. Dashed lines represent exponential fit. **C:** Growth rate remains constant over time in the mother-machine experiments. In this example cells were treated with 0.25 μg.mL<sup>-1</sup> of A22.



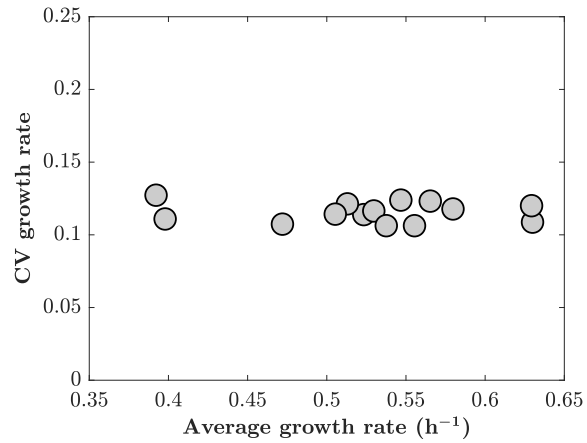

**Figure 2 - Figure Supplement 3. Coefficient of variation of growth rate as a function of average growth rate.**

Each point represents one biological replicate generated in mother machine.

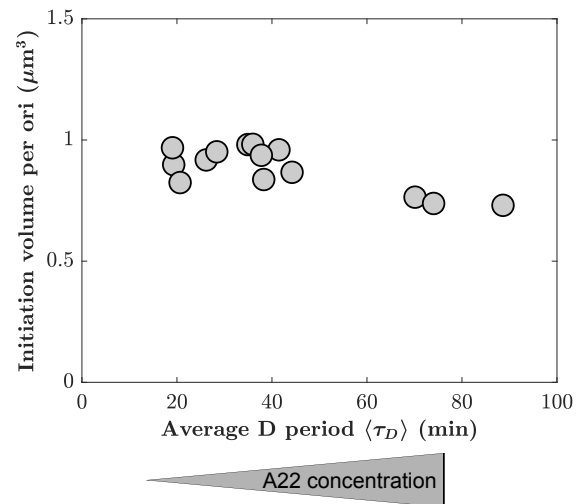

**Figure 2 - Figure Supplement 4. Mean initiation volume per ori as a function of average D period.**

Mean initiation volume is computed from individual lengths and mean width at the time of replication initiation, assuming spherocylindrical cells.

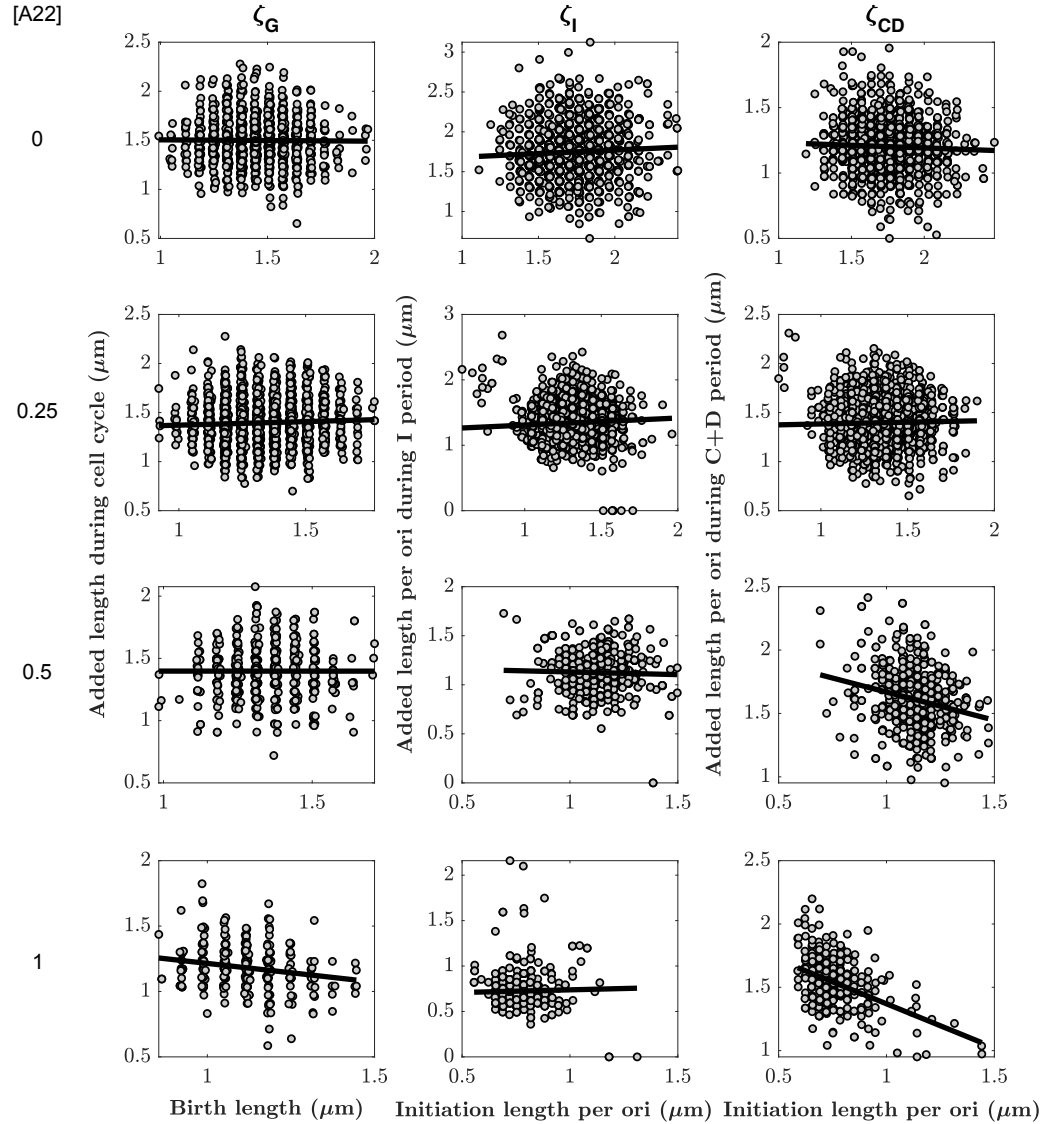

**Figure 3 - Figure Supplement 1. Added lengths during different subperiods as a function of the size at the beginning of the respective subperiod for different A22 concentrations.**

The slopes  $\zeta_G$ ,  $\zeta_I$  and  $\zeta_{CD}$  for different A22 concentrations are obtained from robust fits (black lines). Each cloud represents one of three biological replicates.

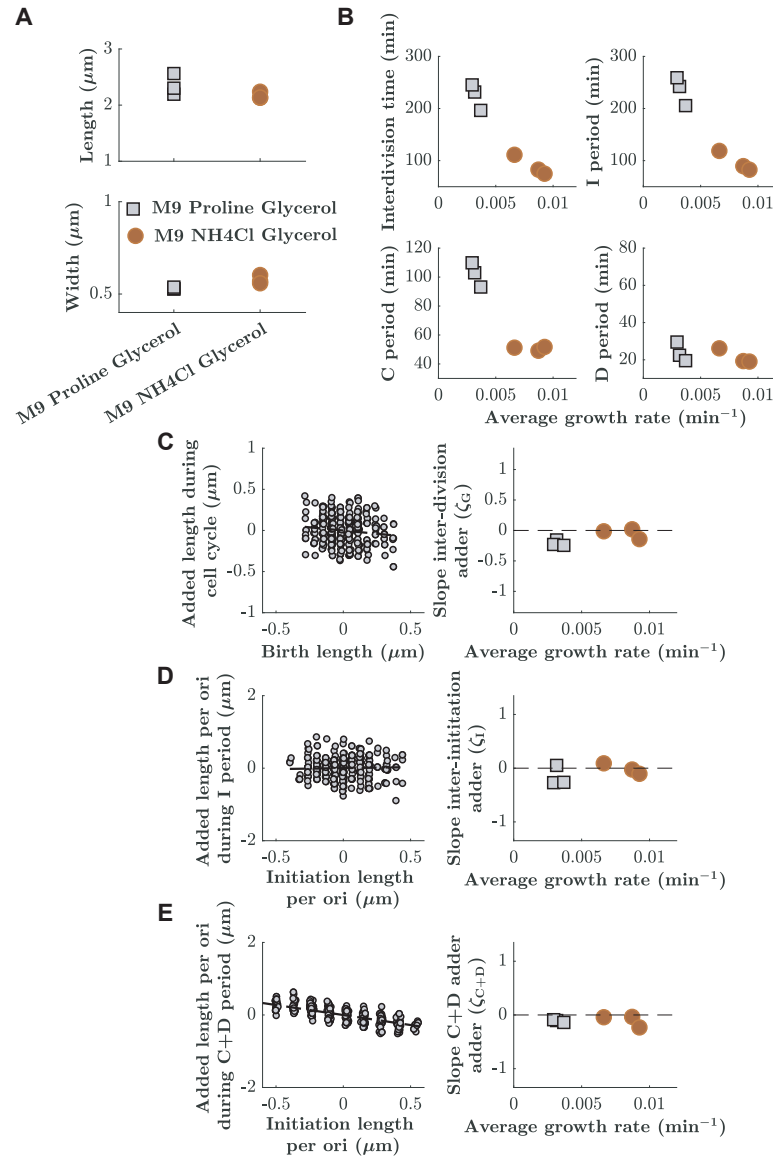

**Figure 3 - Figure Supplement 2. Adder behaviours for cell cycle, I period, and C+D period are robustly maintained at two different growth rates.**

**A:** Lengths and widths obtained for cells grown in two different growth media: M9 Glycerol NH4Cl (red circles) or M9 Glycerol Proline (grey squares). Symbols represent independent biological replicates. **B:** Duration of inter-division time, I period, C period, and D period as a function of average growth rate measured in mother machines. **C, D, E:** Left: Example of division, inter-initiation and C+D adder plots for cells grown at slower growth rate (M9 Proline Glycerol). Right: Slope of division, inter-initiation and C+D adder as a function of average growth rate for cells grown in the two different growth media (M9 Proline Glycerol and M9 NH4Cl Glycerol).

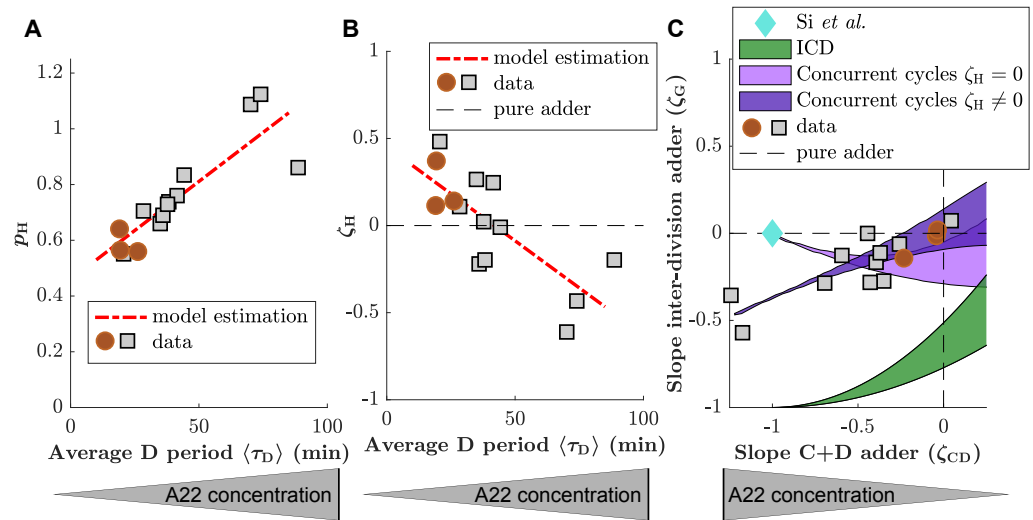

**Figure 4 - Figure Supplement 1. Predictions of the concurrent cycles model if  $\zeta_H$  is left as a free parameter.**

**A,B:** Probability for the cell division process to be limiting ( $p_H$ ) (A) and strength of the inter-division control parameter ( $\zeta_H$ ) (B) for experimental data generated in this study (red circles and grey squares for untreated cells and cells treated with A22). Both  $p_H$  and  $\zeta_H$  are allowed to vary and the values are estimated solving Eq. (S20) for  $p_H$  and  $\zeta_H$ . The linear fit for the different results is shown as red dashed line. **C:**  $\zeta_C$  (division adder slope) as a function of  $\zeta_{CD}$  (C+D adder slope) for data generated in this study (grey circles). Prediction of the replication-independent model by (*Si et al., 2019*) (blue diamond), and of ICD model (green area). Two predictions of the concurrent cycles model are also plotted: light purple: prediction of concurrent cycles model assuming  $\zeta_H = 0$  (see Figure 4). Dark purple: prediction of concurrent cycles model leaving  $\zeta_H$  as a free parameter of the fit (see (A,B)). The shaded areas represent the range of predictions using the maximum and minimum of experimentally measured ratio of variance of size at initiation over size at birth (both for ICD and concurrent cycles) and of the experimentally measured ratio of mean size at division over size at birth (concurrent cycles). The maximum and minimum values are taken over the experimental data reported in this picture, i.e. treated and untreated data acquired for this work.

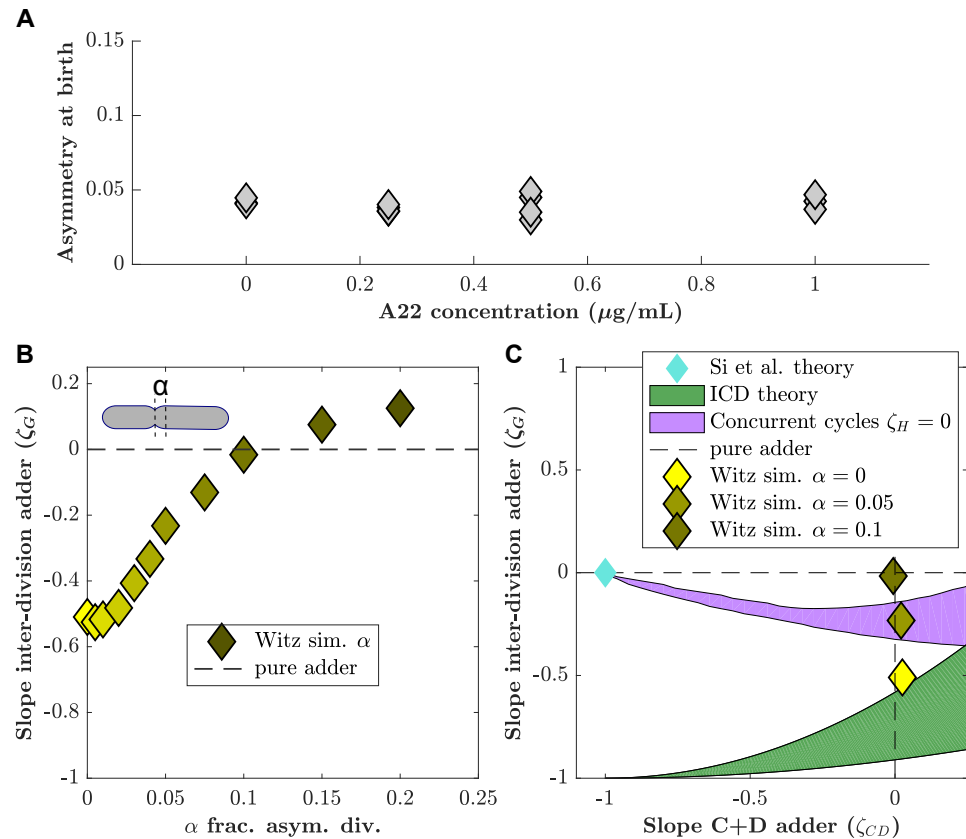

**Figure 4 - Figure Supplement 2. Asymmetric division drives C+D to adder behavior in ICD single-process models.**

Witz and coworkers (*Witz et al., 2019*) proposed an ICD model (see methods) with an adder between consecutive initiations ( $\zeta_I = 0$ ) and in the C+D period ( $\zeta_{CD} = 0$ ), and asymmetric division, which we tested with our data. **A**: The level of asymmetry at birth from our data is about 5%. The asymmetry is computed as  $\left| \frac{(L_{cell1}^{cell1} - L_{cell2}^{cell2})}{(L_{cell1}^{cell1} + L_{cell2}^{cell2})} \right|$  (where *cell 1* and *cell 2* are two daughter cells) and averaged for each dataset. **B**: Simulations of the Witz *et al.* "double adder" ICD model as a function of the asymmetry in division ( $\alpha$ ). (Parameter set as in untreated conditions:  $\langle \mu \rangle = 0.0088 \text{ min}^{-1}$ ,  $\sigma_\mu = 0.001 \text{ min}^{-1}$ ,  $\langle \Delta_I \rangle = 0.875 \text{ } \mu\text{m}^3$ ,  $\sigma_{\Delta_I} = 0.19 \text{ } \mu\text{m}^3$ ,  $\langle \Delta_{CD} \rangle = 1.39 \text{ } \mu\text{m}^3$ ,  $\sigma_{\Delta_{CD}} = 0.16 \text{ } \mu\text{m}^3$ ). For increasing asymmetry, the model recapitulates the near-adder behavior between divisions ( $\zeta_G \simeq 0$ ). **C**:  $\zeta_G$  (division adder slope) as a function of the C+D adder slope  $\zeta_{CD}$  for simulations at  $\alpha = 0$  (bright yellow diamond),  $\alpha = 0.05$  (bright yellow), and  $\alpha = 0.1$  (dark yellow diamond). In our own experimental study find the division asymmetry to be about 5% ( $\alpha = 0.05$ ), consistent with previous reports. Blue diamond: prediction from the Si *et al.* model. Green shaded area: Prediction of the ICD model with no asymmetry in division. Purple shaded area: Prediction of the concurrent cycles model with the hypothesis that  $\zeta_H = 0$ . The shaded areas represent the range of predictions using the maximum and minimum experimentally measured ratio of variance of size at initiation over size at birth (both for ICD and concurrent cycles models) and the experimentally measured ratio of mean size at division over size at birth (for the concurrent cycles model). The maximum and minimum values are taken over the untreated conditions acquired for this work as well as the published data from Si *et al.* (2019) and Witz *et al.* (2019).

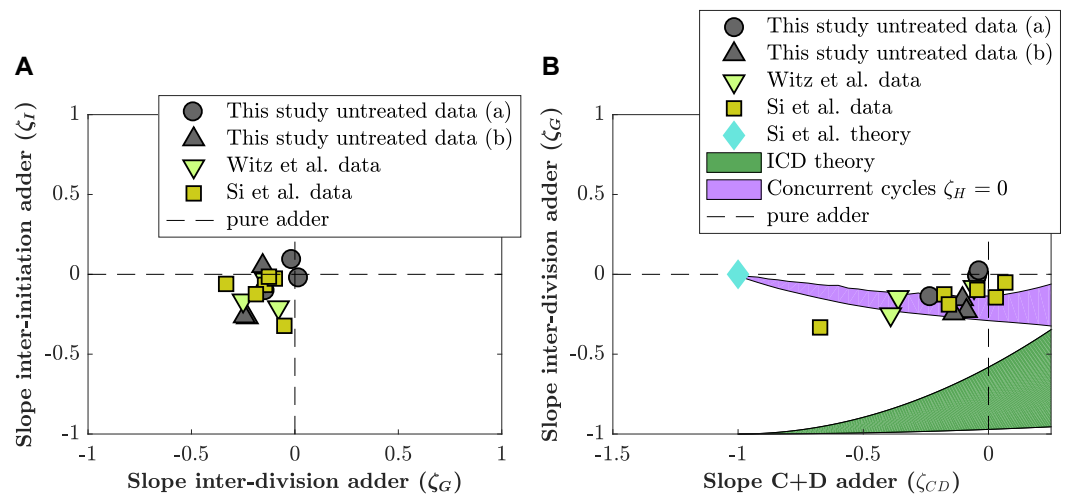

**Figure 4 - Figure Supplement 3. Comparison of adder slopes for data of unperturbed cells generated by different labs.**

**A:** Inter-division adder slope ( $\zeta_G$ ) plotted as a function of inter-initiation slope ( $\zeta_I$ ). Grey circles: data generated in M9(NH<sub>4</sub>Cl) Glycerol medium. Grey triangles: data generated in M9(Proline) Glycerol medium (slow growth rate). Green triangle: data generated by *Witz et al. (2019)*. Yellow square: data generated by *Si et al. (2019)*. **B:** Division adder slope ( $\zeta_G$ ) as a function of the C+D adder slope ( $\zeta_{CD}$ ). Same symbols as in (A) correspond to the same data. Additionally, we also display predictions from different models as in Figure 4 - Figure Supplement 2.

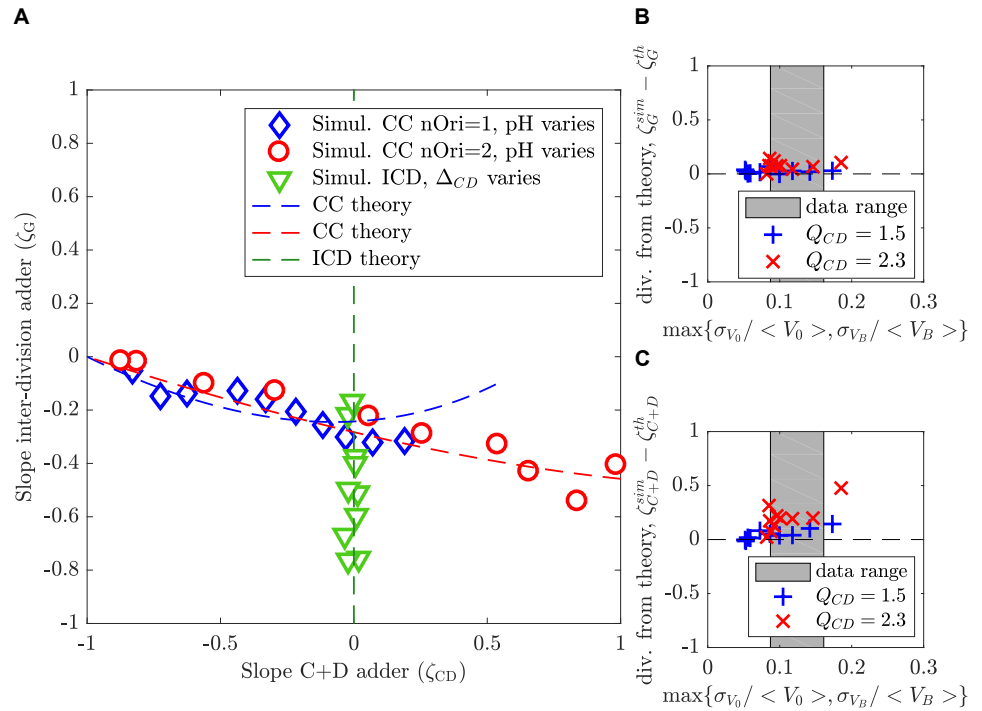

**Figure 4 - Figure Supplement 4. Theoretical predictions in the small-noise approximations agree with simulations at realistic noise levels.**

**A:** The plot shows the slope of the inter-division adder plot  $\zeta_G$  as a function of the slope of the adder plot in the  $C + D$  period  $\zeta_{CD}$  for both the concurrent cycles model (blue and red) and for the ICD model (green), respectively. Theoretical predictions in the small-noise approximation (dashed lines) agree with simulations (symbols). For concurrent cycles, simulation parameters are chosen to maintain noise levels comparable to untreated experimental conditions and to remain on average in the regime of no overlapping rounds (blue diamonds) or a single overlapping round (red circles), while varying  $p_H$ . For ICD (green triangles),  $\Delta_{CD}$  varies in conditions without overlapping rounds. The ratio  $\langle \tau_{C+D} \rangle / \langle \tau \rangle$  ranges from 0.5 to 1.5. **B,C:** The analytical predictions are robust with increasing noise levels. The plots show the difference between the analytical (small-noise) predictions and direct simulations of the size homeostasis parameter  $\zeta$  (slope of the adder plot) for the inter-division cycle (B) and for the  $C + D$  period (C) in the concurrent cycles model, as a function of the maximal relative noise level. Simulation parameters are set to explore the limits of the small noise approximation while maintaining constant  $p_H$  and  $Q_{CD}$ . The grey region indicates the regime of noise levels obtained from our experiments. The  $Q_{CD} = 1.5$  regime correspond to  $\langle \tau_{C+D} \rangle / \langle \tau \rangle \approx 0.6$  (blue + crosses),  $Q_{CD} = 2.3$  regime correspond to  $\langle \tau_{C+D} \rangle / \langle \tau \rangle \approx 1.2$  (red x crosses).

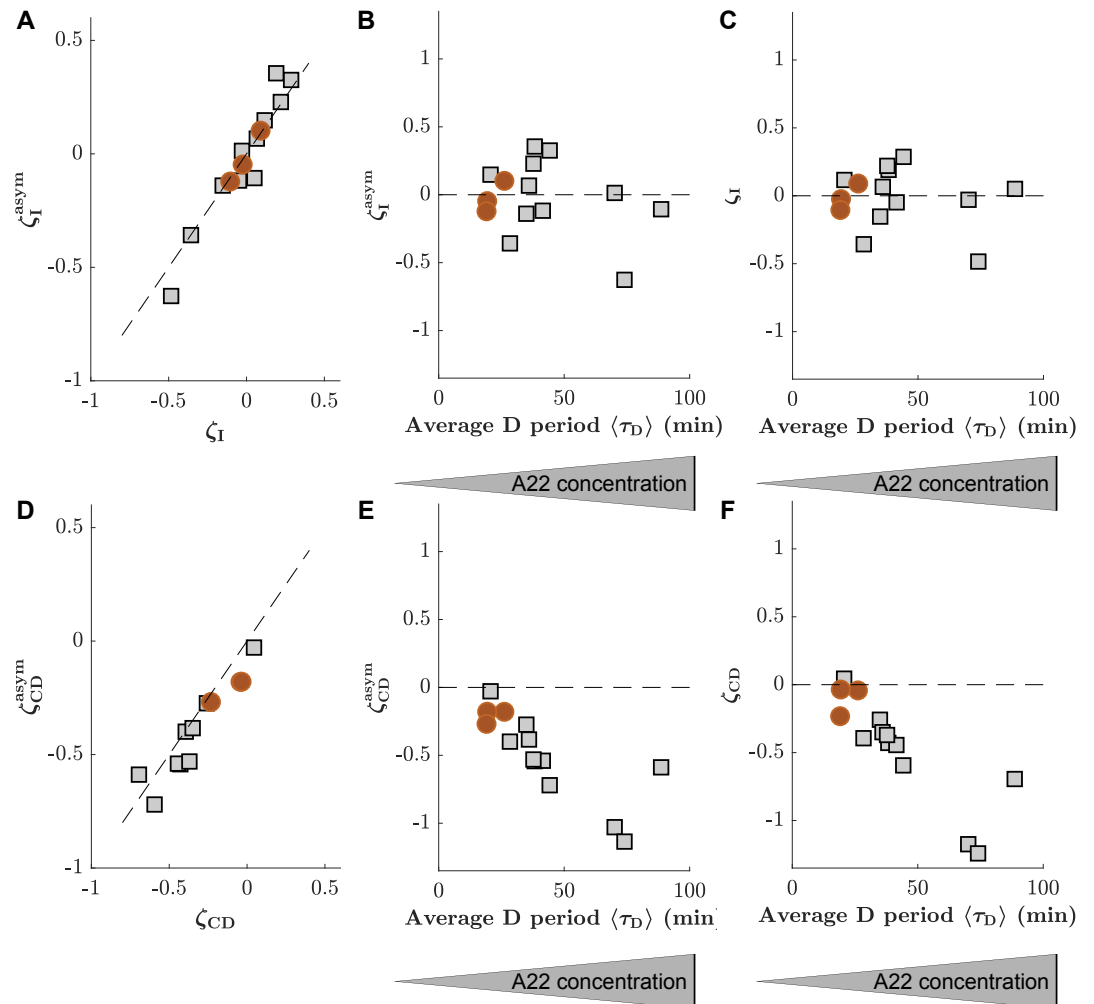

**Figure 4 - Figure Supplement 5. The consideration of asymmetry of cell division has no significant effect on slopes of inter-initiation adder and adder during C+D period.**

**A:** Comparison of inter-initiation adder slope ( $\zeta_I$ ) calculated in two different ways, either by assuming symmetric cell division (y-axis, obtained from  $L_B^{\text{cell}}/n_{\text{cell}} - L_B^{\text{mother}}/n_{\text{mother}}$ , where  $n_X$  is the number of origins at the time of replication initiation in the mother or cell), or by taking asymmetry into account (x-axis, obtained through correction as indicated in Materials and Methods). **B:**  $\zeta_I^{\text{asym}}$  as a function of the average D period, assuming symmetric division. **C:**  $\zeta_I^{\text{asym}}$  as a function of the average D period, correcting for asymmetric division. **D-E:** Comparison of the adder slopes during the C+D period generated while ignoring or considering division asymmetry. Panels are analogous to panels (A-C). Circles (red) and squares (grey) represent unperturbed conditions and A22-treatment, respectively. Each symbol represents an independent biological replicate.



## 746 **Supplementary Videos**

**Figure 2 - video 1.** Movie of cells grown in mother machine devices for different treatments with A22. Red: cytoplasmic-mCherry. Green: YPet-DnaN. 1 image every 6 minutes. Scale bar is 5  $\mu\text{m}$ .

## 747 Supplementary files

### 748 Supplementary file 1

749 (recap\_table.csv). Characterization of different single-cell datasets including **Experiment Name**,  
750 **strain**, **growth medium**, **perturbation**, **Numberofcells**: number of cells taken into account, **Per-**  
751 **centagekept**: Percentage of cells kept after the DNA replication scoring, that is, cells in which we  
752 were able to detect initiation and termination, **Growthrate**, **GrowthrateCV**: exponential growth  
753 rate of the cell (obtained from an exponential fit on the length; units:  $\text{min}^{-1}$ ) and CV (coefficient  
754 of variation), **Width**: Mean cell width (units:  $\mu\text{m}$ ), **BirthLength**, **BirthLengthCV**: Mean length  
755 at birth (units:  $\mu\text{m}$ ) and CV, **InitiationLength**, **InitiationLengthCV**: Mean initiation length per  
756 ori (units:  $\mu\text{m}$ ) and CV, **DivisionLength**, **DivisionLengthCV**: Mean length at division (units:  $\mu\text{m}$ )  
757 and CV, **taucycle**, **taucycleCV**: Mean duration of the cell cycle (units: min) CV, **taul**, **taul\_CV**:  
758 Mean duration of the inter-initiation time (units: min) and CV, **tauC**, **tauC\_CV**: Mean C period  
759 (units: min) and CV, **tauD**, **tauD\_CV**: Mean D period (units: min) and CV, **slope\_division\_adder**,  
760 **slope\_initiation\_adder**, **slope\_CD\_adder**: Slopes of the division-adder plot, initiation-adder plot,  
761 and C+D-adder plots, respectively.

### 762 Supplementary file 2

763 (Single\_cell\_data\_table.csv). Single-cell data used in this study.  
764 **ExperimentName**: Label of the experiment (same as in the Supplementary File 1), **grandmother**:  
765 Cell ID of the grandmother cell, **mother**: Cell ID of the mother cell, **cell**: Cell ID of the cell,  
766 **Linit\_cell**: Initiation length per ori of the cell ( $\mu\text{m}$ ) (note that this initiation can happen in the  
767 mother cell), **Linit\_mother**: Initiation length per ori of the mother ( $\mu\text{m}$ ) (note that this initiation  
768 can happen in the grandmother cell), **Lterm\_cell**: Termination length per ori of the cell ( $\mu\text{m}$ ),  
769 **Lterm\_mother**: Termination length per ori of the mother ( $\mu\text{m}$ ), **Tinit\_cell**: Initiation time of the cell  
770 (min), **Tinit\_mother**: Initiation time of the mother (min), **Tterm\_cell**: Termination time of the cell  
771 (min), **Tterm\_mother**: Termination time of the mother (min), **Tbirth\_grandmother**: Birth time of  
772 the grandmother (min), **Tbirth\_cell**: Birth time of the cell (min), **Tbirth\_mother**: Birth time of the  
773 mother (min), **Tdivision\_mother**: Division time of the mother (min), **growthrate\_mother**: Growth  
774 rate of the mother cell ( $\text{min}^{-1}$ ), **growthrate\_grandmother**: Growth rate of the grandmother cell  
775 ( $\text{min}^{-1}$ ), **Tdivision\_cell**: Division time of the cell (min), **growthrate\_cell**: Growth rate of the cell  
776 ( $\text{min}^{-1}$ ), **Lbirth\_cell**: Birth length of the cell ( $\mu\text{m}$ ), **Ldivision\_cell**: Division length of the cell ( $\mu\text{m}$ ),  
777 **Width\_cell**: Width of the cell ( $\mu\text{m}$ ).

778 **Supplementary datasets for figures and tables**

779 **Figure 2**

780 The file Fig2\_Data.xlsx contains:

| Sheet      | Description                                                                                                                      |
|------------|----------------------------------------------------------------------------------------------------------------------------------|
| Fig2B      | Mean length and width measured for cells grown in liquid cultures and in mother machine and treated with various amounts of A22. |
| Fig2C      | Mean values of interdivision time, I, C and D periods for cells grown in mother machine with different A22 concentrations.       |
| 781 Fig2D  | Structure of the probability density map.                                                                                        |
| Fig2-Sup2A | Growth rate for cells grown in liquid cultures and in mother machine and treated with various amounts of A22.                    |
| Fig2-Sup2B | Estimation of growth rate in liquid culture.                                                                                     |
| Fig2-Sup3  | CV growth rate as a function of average growth rate                                                                              |
| Fig2-Sup4  | Initiation volume as a function of average D period                                                                              |

782 **Figure 3**

783 The file Fig3\_Data.xlsx contains:

| Sheet      | Description                                                                                                                                      |
|------------|--------------------------------------------------------------------------------------------------------------------------------------------------|
| Fig3A      | Clouds of points of added length during cell cycle for untreated cells and cells treated with $1 \mu\text{g.mL}^{-1}$ of A22                     |
| Fig3B      | Slope of inter-division adder as a function of average D period                                                                                  |
| Fig3C      | Clouds of points of added length during I period for untreated cells and cells treated with $1 \mu\text{g.mL}^{-1}$ of A22                       |
| Fig3D      | Slope of inter-initiation adder as a function of average D period                                                                                |
| 784 Fig3E  | Clouds of points of added length during C+D period for untreated cells and cells treated with $1 \mu\text{g.mL}^{-1}$ of A22                     |
| Fig3F      | Slope of C+D adder as a function of average D period                                                                                             |
| Fig3G      | Clouds of points of division length as a function of initiation length for untreated cells and cells treated with $1 \mu\text{g.mL}^{-1}$ of A22 |
| Fig3H      | Slope of division length as a function of initiation length, as a function of average D period                                                   |
| Fig3-Sup1  | Examples of clouds for the different adders at different A22 concentrations.                                                                     |
| Fig 3-Sup2 | Various parameters measured for cells grown in M9 $\text{NH}_4\text{Cl}$ Glycerol and in M9 Proline Glycerol.                                    |

786 **Figure 4**

787 The file Fig4\_Data.xlsx contains:

---

| Sheet          | Description                                                                                                                                                                                                 |
|----------------|-------------------------------------------------------------------------------------------------------------------------------------------------------------------------------------------------------------|
| Fig4B          | $\rho_H$ as a function of average D period.                                                                                                                                                                 |
| Fig4C          | Inter-division slope as a function of C+D adder slope and predictions of different models.                                                                                                                  |
| Fig4-Sup1      | $\rho_H$ as a function of average D period if $\zeta_H$ is left as free parameter.                                                                                                                          |
| Fig4-Sup2A     | Asymmetry estimated from the data generated in our study.                                                                                                                                                   |
| Fig4-Sup2B     | Simulations of the double adder ICD model as a function of the asymmetry in division.                                                                                                                       |
| 788 Fig4-Sup2C | Inter-division slope as a function of C+D adder slope as predicted by different models.                                                                                                                     |
| Fig4-Sup3      | Dependency of inter-initiation adder slope, inter-division adder slope and C+D adder slope for data generated in this study (at slow and intermediate growth rate) and for data generated in other studies. |
| Fig4-Sup4      | Theoretical predictions in the small-nois approximation.                                                                                                                                                    |
| Fig4-Sup5      | Comparison of inter-initiation and C+D adders slopes when asymmetry is taken into account.                                                                                                                  |

---

789
